# Supplementary material for: Controllable color emission of platinum(ii) complexes and their application in light-emitting diodes (LEDs)
Source: Royal Society of Chemistry journal article supplement (doi:10.1039/d1tc01398j), 2021-01-01
Supplement: d1tc01398j1.pdf [file d1tc01398j1.pdf]

## Experimental section

### Physical measurements and instrumentation

<sup>1</sup>H NMR spectra were recorded on a Bruker DPX 400 FT–NMR spectrometer 400 MHz at 298 K. Electrospray ionization mass spectra (ESI–MS) were performed on a Bruker Maxis 4G ESI–Q–TOF Bruker using electrospray ionization (positive ion mode: ESI) in CHCl<sub>3</sub> or MeCN solution. Elemental analyses of the complexes were made using a PerkinElmer 240 elemental analyzer. Electronic absorption spectra in the UV–visible region were recorded with a Shimadzu UV–3600 spectrophotometer, in a 10×1 mm or 10×10 mm quartz cell. The photoluminescence spectra were measured on Edinburgh Instruments FS 5 and FLS 980 fluorescence spectrophotometers. Time-dependent single-photon counting technology (picosecond to microsecond) and multi-channel scanning technology (microsecond to second) were used for decay lifetime acquisition, using FLS 980 fluorescence spectrophotometer with 405 nm laser light source. The quantum yields (QYs) were measured using a Hamamatsu C9920-02G absolute photoluminescence quantum yield (PLQY) measurement system. Scanning electron microscopy (SEM) experiments were performed by using field emission scanning electron microscope (FESEM, Hitachi, SU8010) operating at an electron acceleration energy of 1 kV and 10 μA. The SEM samples were prepared by dropcasting solutions onto a silicon wafer and dried naturally. Powder XRD was performed on a Rigaku X–ray diffractometer (D/max–rA, Cu–K $\alpha$  radiation ( $\lambda = 1.542 \text{ \AA}$ )).

### Crystal structure determination

Single–crystal diffraction data of platinum(II) complexes **1–4** were collected on a

Rigaku SuperNova X-ray diffractometer using micro-focus dual with X-ray Source of Cu-K $\alpha$  radiation ( $\lambda = 1.54178 \text{ \AA}$ ) at 150 K. Using Olex2<sup>1, 2</sup>, the structures were solved by SHELXT and refined using the full-matrix least-squares procedures within the SHELXTL software package. CCDC **2051570**, **2051571**, **2051572** and **2051573** contain the supplementary crystallographic data for complexes **1–4**, respectively, and can be obtained free of charge from the Cambridge Crystallographic Data Centre *via* [www.ccdc.cam.ac.uk/data\\_request/cif](http://www.ccdc.cam.ac.uk/data_request/cif).

### **Computational Details.**

All the calculations are performed using combination of B3LYP/8-8G\* (GENECP for Pt atoms) with the Gaussian 09 program suite.<sup>3</sup> By density functional theory (DFT), the ground -state geometries of complexes **1–4** are fully optimized. Time-dependent DFT (TDDFT) calculations are then performed on the optimized ground-state geometries at the same level of theory to compute the singlet–singlet and singlet–triplet transitions. In order to gain more insight into the emissive states, the geometries of the lowest-lying triplet excited states ( $T_1$ ) are optimized with unrestricted formalism.<sup>4</sup>

### **Fabrication of LED Devices**

Putting 5 mg platinum(II) complexes **1–4** mixed with stoichiometric pouring sealant (HN3153–TCA/B) respectively, in a small beaker according to the mass ratio of 1:100, and then stirred thoroughly for 15 min. After deaeration in vacuum, the mixture was dropped on top of the commercial LED chip (an emission wavelength of about 380 nm) with possibly 2 mm thick films. The Electroluminescence measurements of LEDs were carried out at room temperature using the Photoresearch Spectrascan ® PR-735.

## Materials and reagent

All starting materials were obtained from commercial suppliers and were used as received. The potassium tetrachloroplatinate(II) ( $K_2[PtCl_4]$ ) were purchased from J&K Scientific Ltd. 2-(Tributylstannyl) pyridine, *N*-(4-ethynylphenyl)-*N*-phenylbenzenamine, 1-ethynylbenzene and 1,5-dibromo-2,4-dimethylbenzene were obtained from the Aladdin Industrial Co. The chloroplatinum(II) complex precursor ( $[Pt(N^C^N)Cl]$ ) was synthesized according to the literature<sup>5-8</sup>. The synthetic routes of chloroplatinum(II) complexes and target complexes **1-4** are shown in **Schemes S1** and **S2**, respectively.

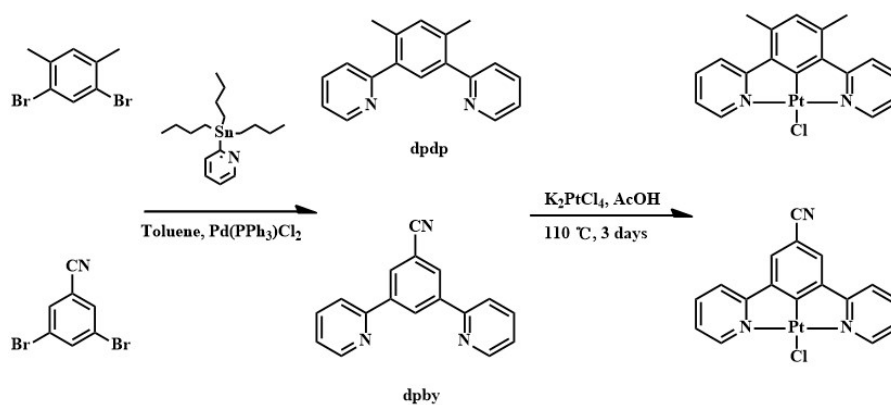

**Scheme S1** Synthetic routes of dpdp, dpby ligands, and platinum(II) complexes **1**, **2**.

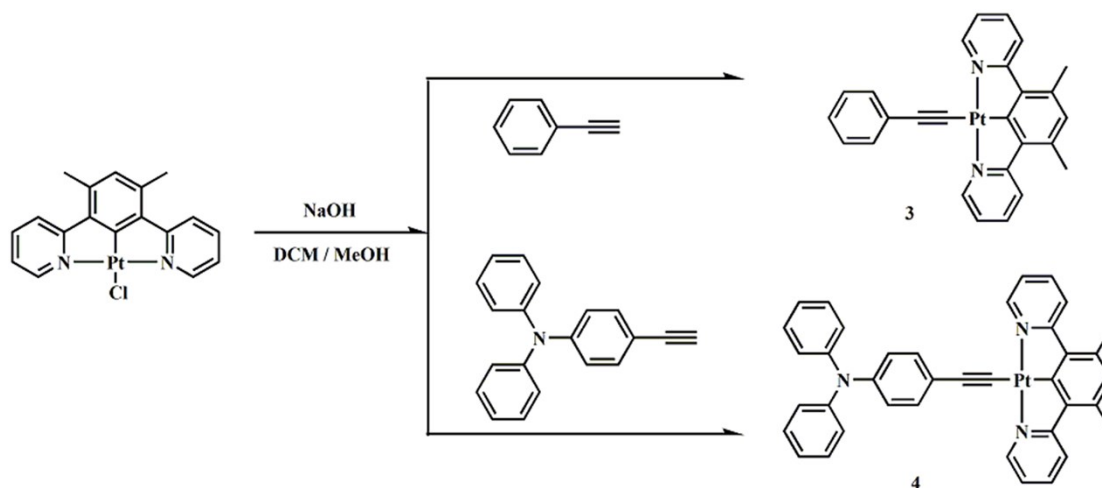

**Scheme S2** Synthetic routes of platinum(II) complexes **3** and **4**.

For **dpdp**: C<sub>18</sub>H<sub>16</sub>N<sub>2</sub>: <sup>1</sup>H NMR (400 MHz, CDCl<sub>3</sub>): δ 8.67 (s, 2H, -Py<sup>1</sup>), 7.72 (m, 2H, -Py<sup>3</sup>), 7.45 (m, 3H, -Py<sup>4</sup> and -Ph<sup>7</sup>), 7.21 (m, 3H, -Py<sup>2</sup> and -Ph<sup>6</sup>), 2.41 (s, 6H, -CH<sub>3</sub><sup>5</sup>).  
MS (ESI<sup>+</sup>): m/z : 261.13 (100%). Elemental analysis calcd (%) for C<sub>18</sub>H<sub>16</sub>N<sub>2</sub>: C 83.04, H 6.19, N 10.76; found: C 83.06, H 6.21, N 10.72.

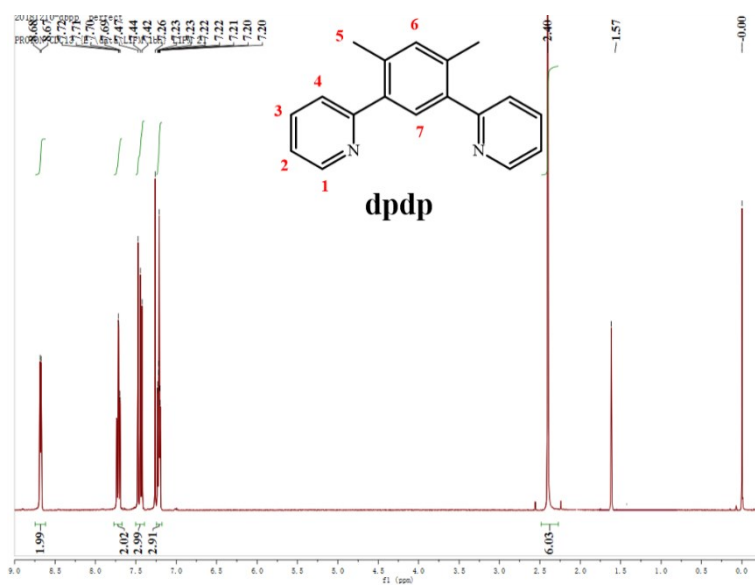

**Figure S1** <sup>1</sup>H-NMR spectra for ligand **dpdp**.

For **dpby**: C<sub>17</sub>H<sub>11</sub>N<sub>3</sub>: <sup>1</sup>H NMR (400 MHz, CDCl<sub>3</sub>): δ 8.91 (s, 1H, -Ph<sup>1</sup>), 8.78 (d, 2H, -Py<sup>2</sup>), 8.39 (d, 2H, -Ph<sup>6</sup>), 7.86 (m, 4H, -Py<sup>3,4</sup>), 7.36 (m, 2H, -Py<sup>5</sup>). MS (ESI<sup>+</sup>): m/z : 258.29 (100%). Elemental analysis calcd (%) for C<sub>17</sub>H<sub>11</sub>N<sub>3</sub>: C 79.36, H 4.31, N 16.33; found: C 79.29, H 4.34, N 16.35.

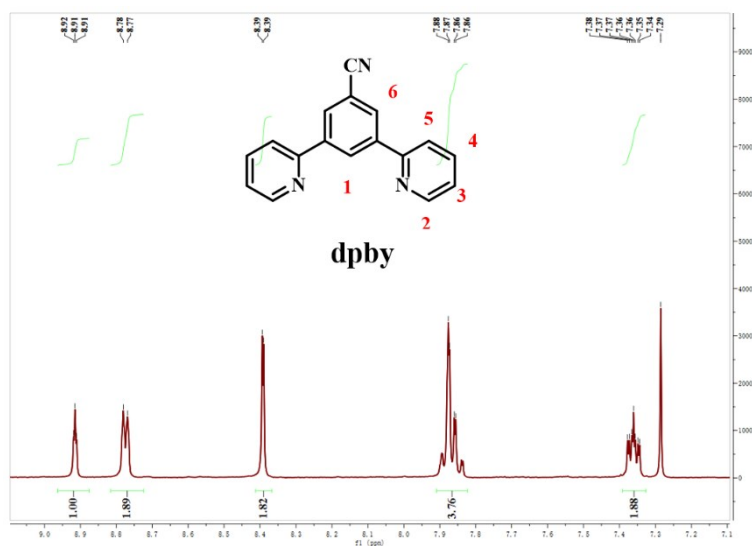

**Figure S2** <sup>1</sup>H-NMR spectra for ligand **dpby**.

For **1**: C<sub>18</sub>H<sub>15</sub>N<sub>2</sub>ClPt: <sup>1</sup>H NMR (400 MHz, CDCl<sub>3</sub>): δ 9.48 (m, 2H, -Py<sup>1</sup>), 7.86 (m, 4H, -Py<sup>2, 4</sup>), 7.21 (t, 2H, -Py<sup>3</sup>), 6.78 (s, 1H, -Ph<sup>5</sup>), 2.65 (s, 6H, -CH<sup>3</sup>). MS (ESI<sup>+</sup>): m/z: 454.09 [M-Cl]<sup>+</sup>. Elemental analysis calcd (%) for C<sub>18</sub>H<sub>15</sub>N<sub>2</sub>ClPt: C 47.58, H 3.33, N 6.16; found: C 47.53, H 3.29, N 6.19.

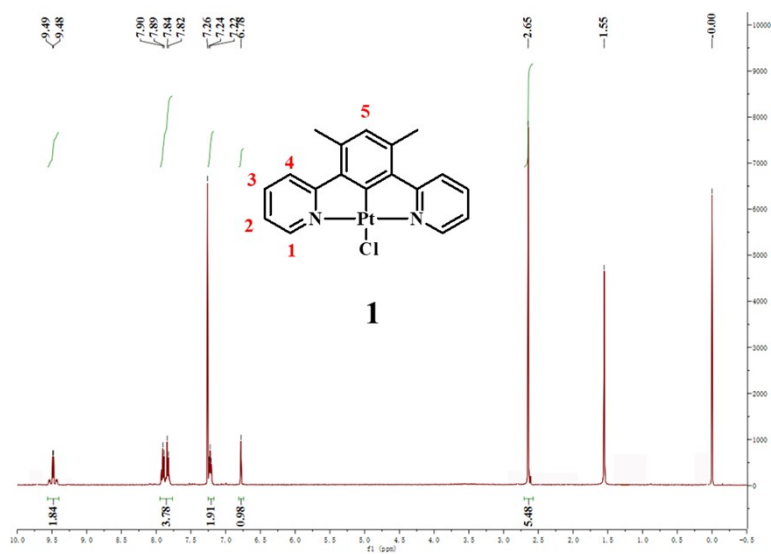

**Figure S3** <sup>1</sup>H-NMR spectra of complex **1**

For **2**: C<sub>17</sub>H<sub>10</sub>N<sub>3</sub>ClPt: <sup>1</sup>H NMR (400 MHz, d-DMSO): δ 9.16 (d, 2H, -Py<sup>1</sup>), 8.29 (m, 6H, -Py<sup>2,3</sup> and -Ph<sup>5</sup>), 9.15 (m, 2H, -Py<sup>4</sup>). MS (ESI<sup>+</sup>): m/z: 452.37 [M-Cl]<sup>+</sup>. Elemental analysis calcd (%) for C<sub>17</sub>H<sub>10</sub>N<sub>3</sub>ClPt: C 41.94, H 2.07, N 8.63; found: C 41.96, H 2.03, N 8.66.

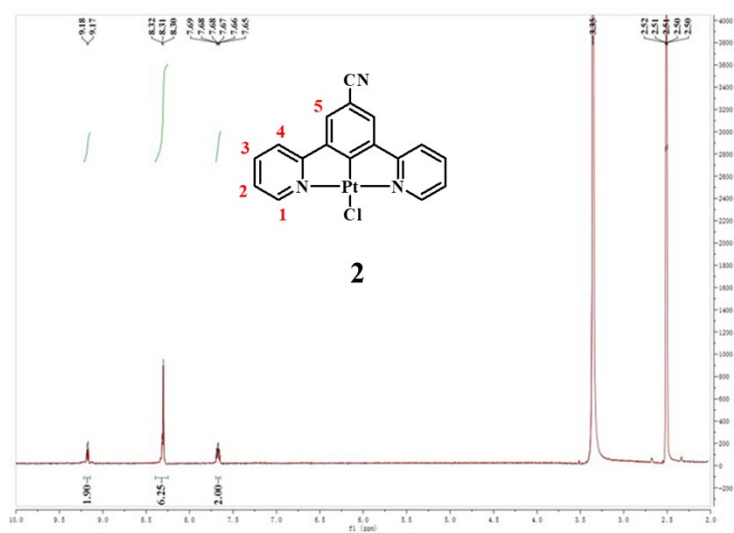

**Figure S4** <sup>1</sup>H-NMR spectra of complex **2**.



For **3**: C<sub>26</sub>H<sub>20</sub>N<sub>2</sub>Pt: <sup>1</sup>H NMR (400 MHz, CDCl<sub>3</sub>): δ 9.66 (d, 2H, -Py<sup>1</sup>), 7.88 (m, 4H, -Py<sup>2,4</sup>), 7.58 (t, 2H, -Ph<sup>6</sup>), 7.30 (d, 2H, -Ph<sup>7</sup>), 7.19 (m, 3H, -Ph<sup>3,8</sup>), 2.65 (s, 6H, -CH<sup>3</sup>).

MS (ESI<sup>+</sup>): m/z: 555.13. Elemental analysis calcd (%) for C<sub>26</sub>H<sub>20</sub>N<sub>2</sub>Pt: C 56.21, H 3.23, N 5.04; found: C 56.24, H 3.19, N 5.06.

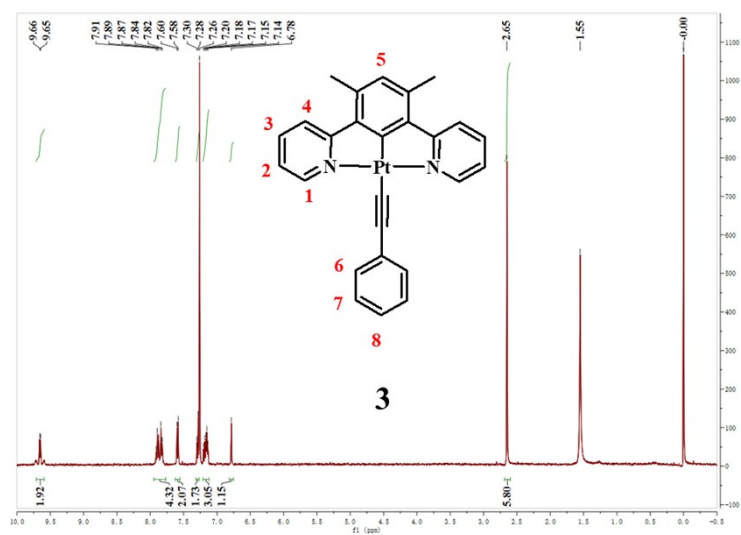

**Figure S5** <sup>1</sup>H-NMR spectra of complex **3**.

For **4**: C<sub>38</sub>H<sub>9</sub>N<sub>3</sub>Pt: <sup>1</sup>H NMR (400 MHz, CDCl<sub>3</sub>): δ 9.65 (s, 2H, -Py<sup>5</sup>), 7.89(t, 2H, -Py<sup>3</sup>), 7.83 (d, 2H, -Py<sup>2</sup>), 7.48 (d, 2H, -Ph<sup>6</sup>), 7.23 (d, 4H, -Ph<sup>9, 11</sup>), 7.12 (m, 6H, -Ph<sup>7, 8, 12</sup>), 7.00 (m, 4H, -Py<sup>4</sup> and -Ph<sup>10</sup>), 6.78 (s, 1H, -Ph<sup>1</sup>), 2.65 (s, 6H, -CH<sub>3</sub>). MS (ESI<sup>+</sup>): m/z: 723.74. Elemental analysis calcd (%) for C<sub>38</sub>H<sub>9</sub>N<sub>3</sub>Pt: C 63.15, H 4.04, N 5.81; found: C 63.06, H 4.15, N 5.79.

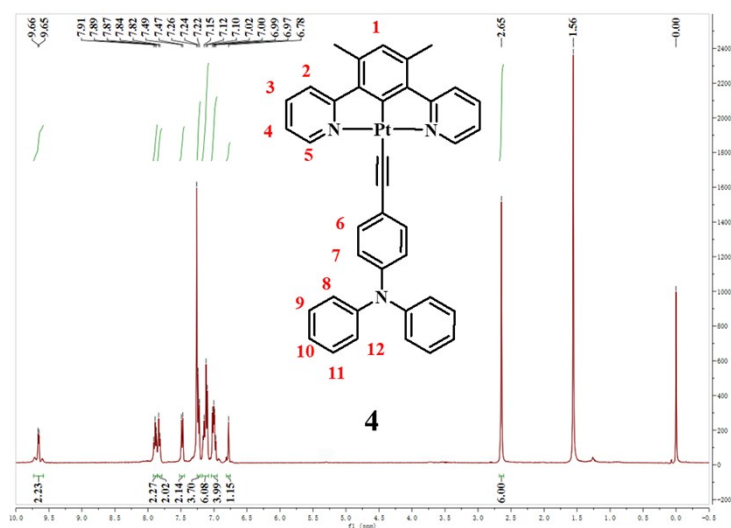

**Figure S6** <sup>1</sup>H-NMR spectra of complex **4**.

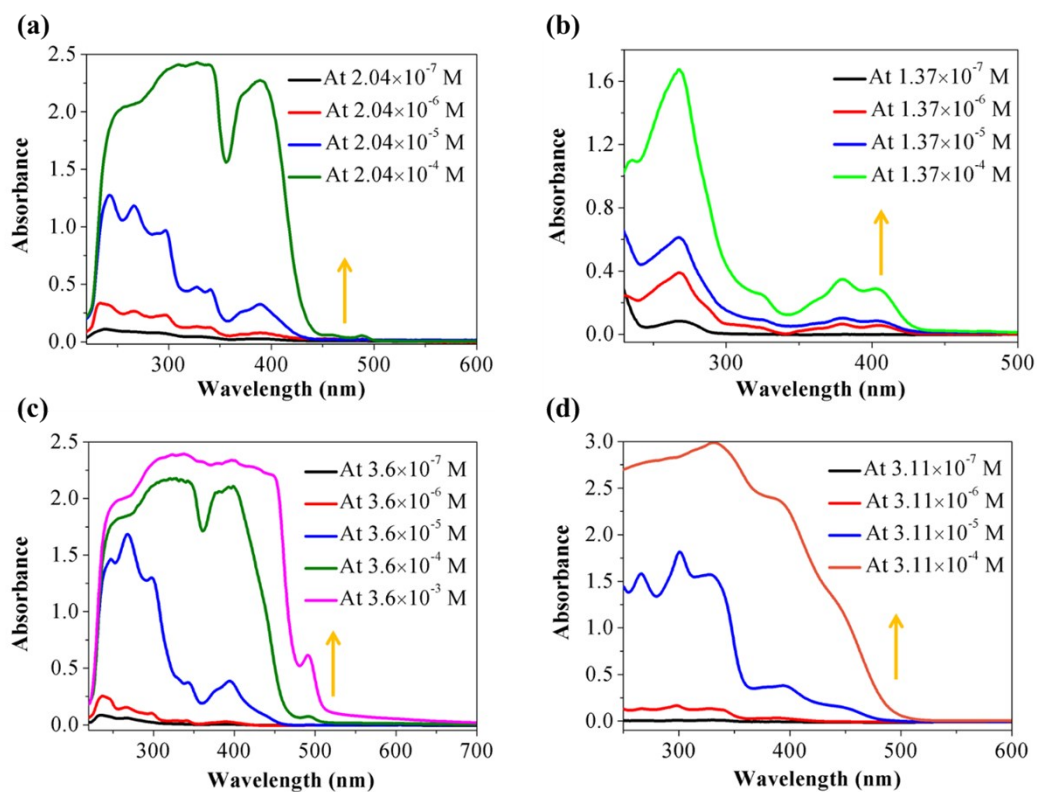

**Figure S7** Concentration dependent UV-vis absorption spectra of the complexes a), 1; b), 2; c), 3; d), 4.

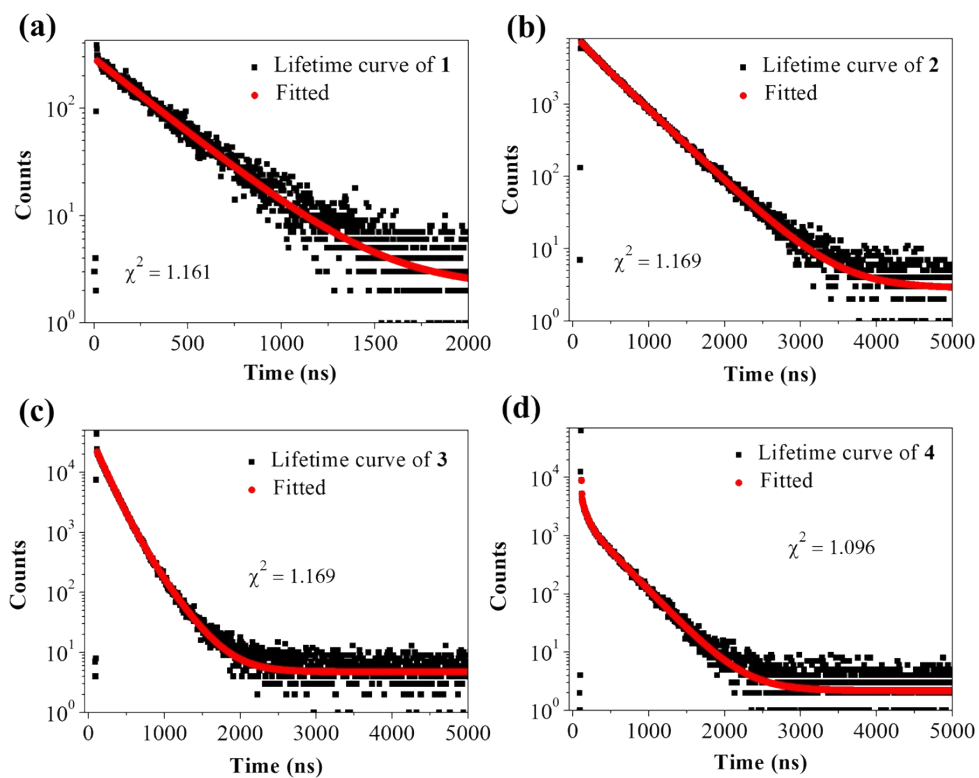

**Figure S8** Decay curves of complexes 1-4 in DCM solution at room temperature.

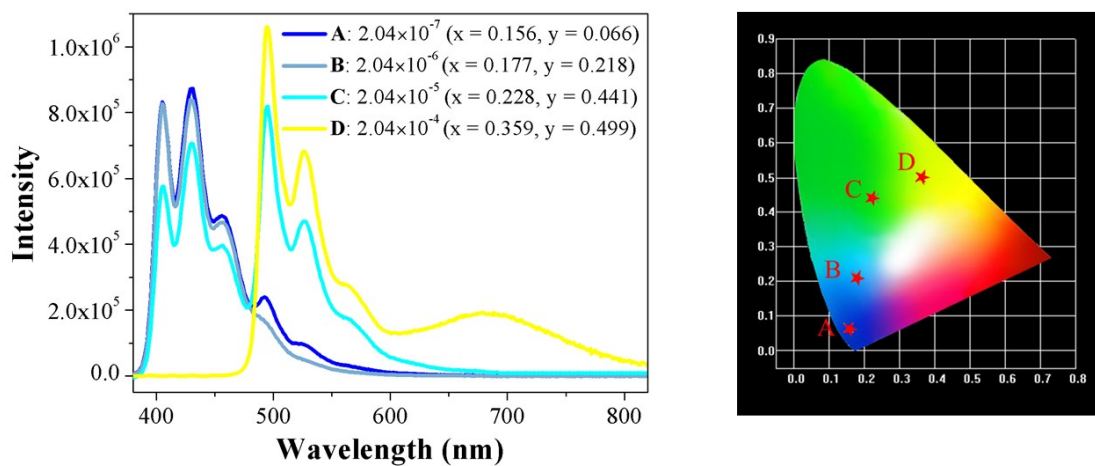

Figure S9 Concentration dependent emission spectra of complex 1.

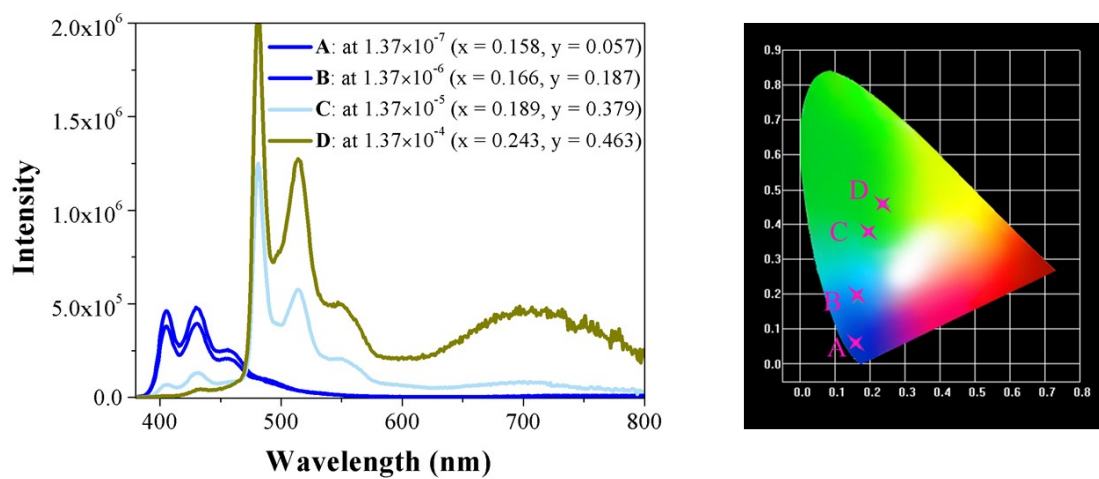

Figure S10 Concentration dependent emission spectra of complex 2.

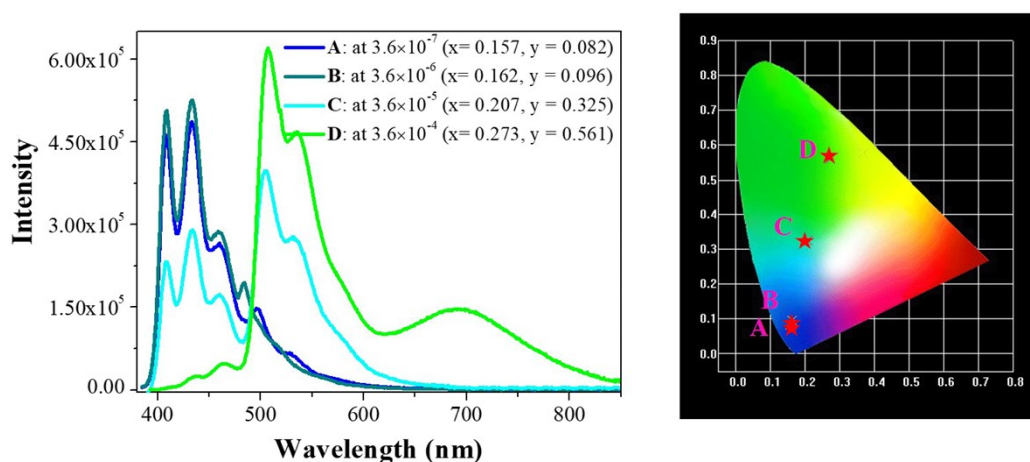

Figure S11 Concentration dependent emission spectra of complex 3.

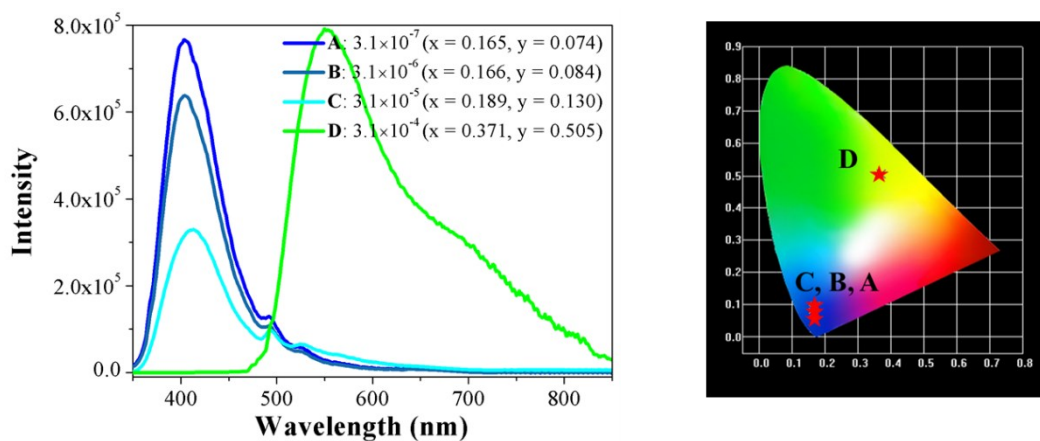

**Figure S12** Concentration dependent emission spectra of complex 4.

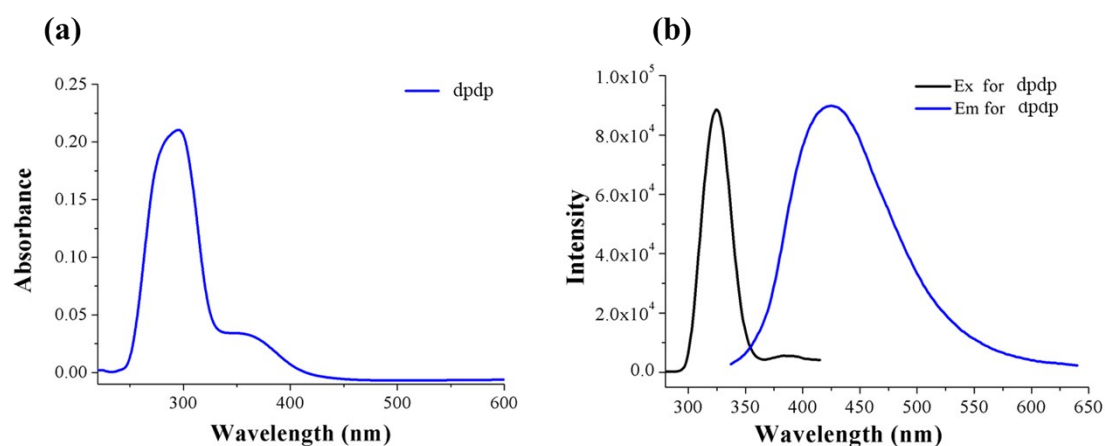

**Figure S13** UV-vis absorption (a), and excitation, emission (b) spectra of the ligand dpdp at the concentration of  $10^{-5}$  M at RT.

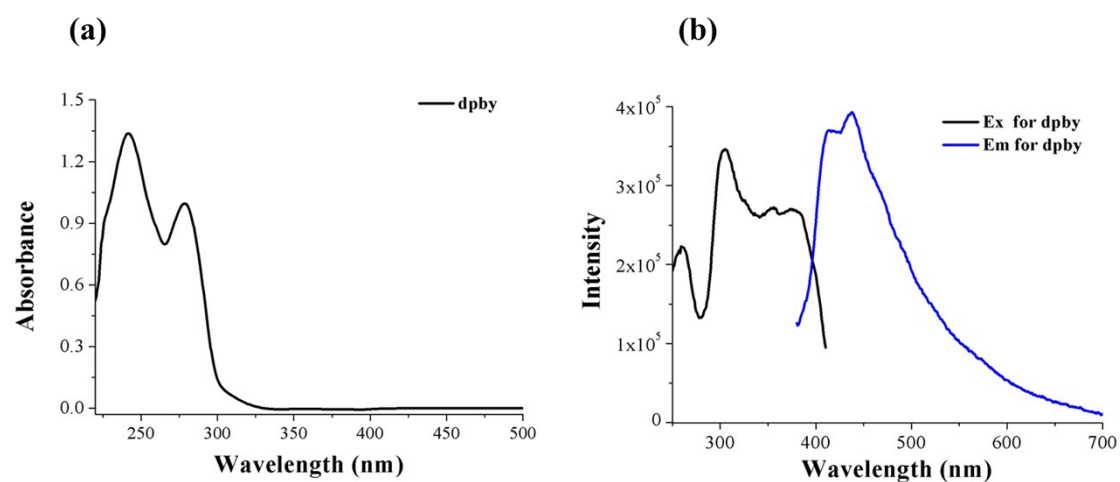

**Figure S14** UV-vis absorption (a), and excitation, emission (b) spectra of the ligand dpby at the concentration of  $10^{-5}$  M at RT.

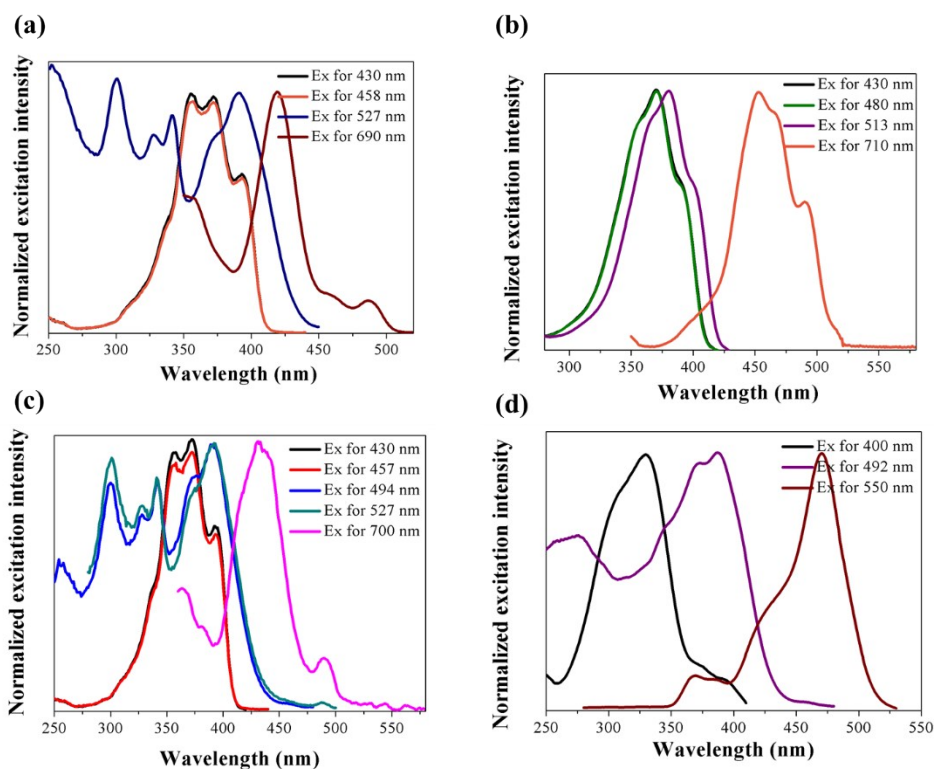

**Figure S15** Normalized excitation spectra at different emission wavelengths of complexes 1–4 in DCM solution, a) 1, b) 2, c) 3 and d) 4.

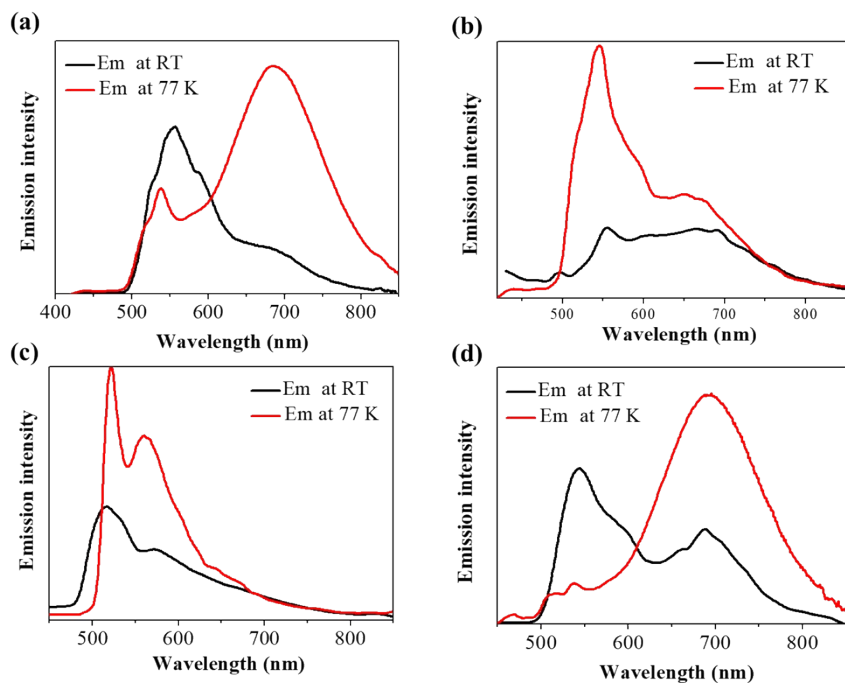

**Figure S16** Normalized emission spectra of complexes 1–4 in solid state at 77 K and room temperature (RT), a) 1, b) 2, c) 3 and d) 4.

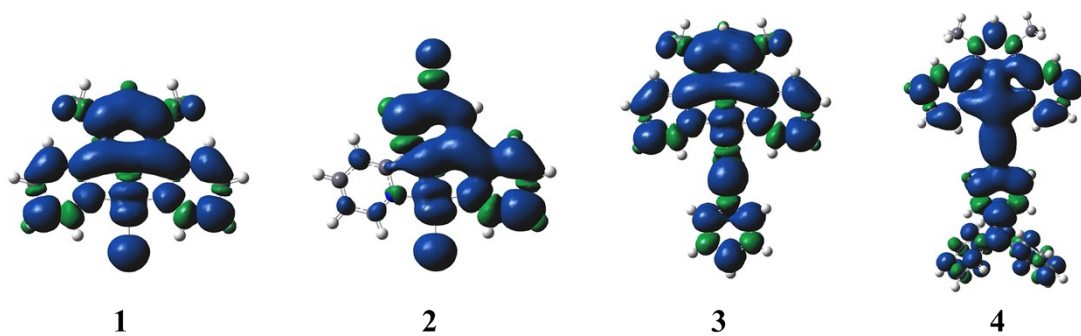

**Figure S17** Spin density of  $T_1$  states of **1–4**.

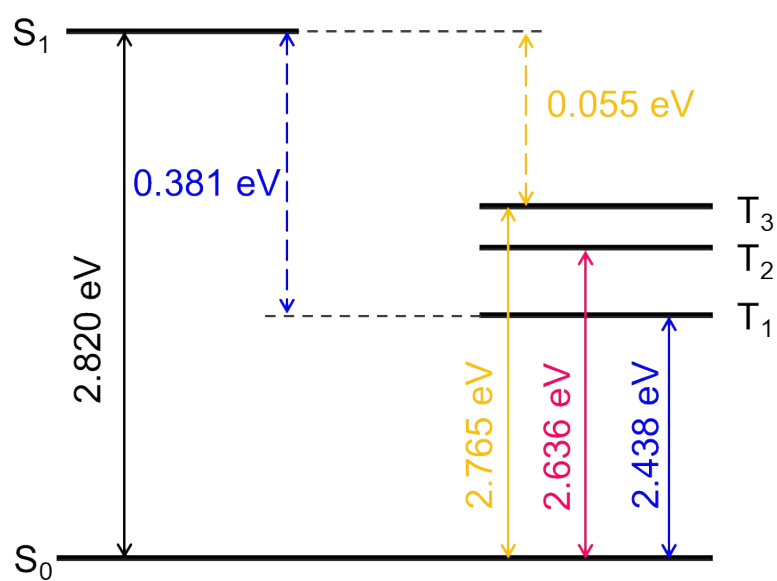

**Figure S18** Orbital energy diagram of complex **1**.

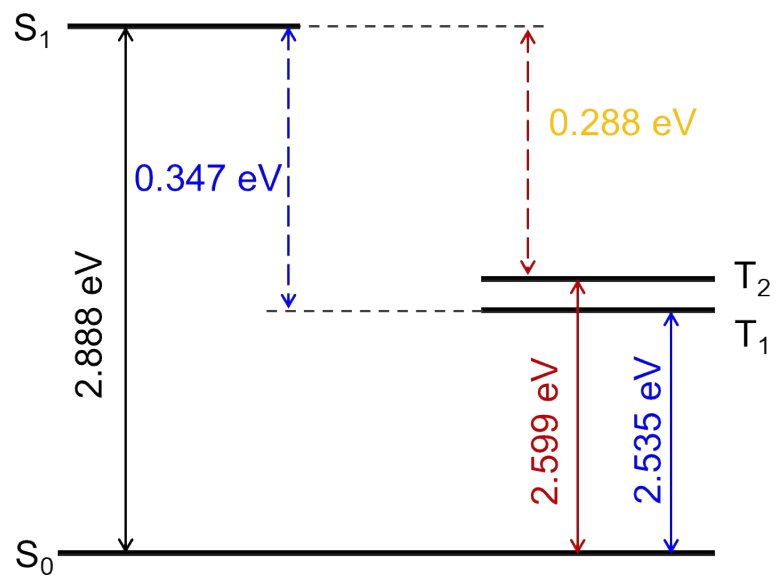

**Figure S19** Orbital energy diagram of complex 2.

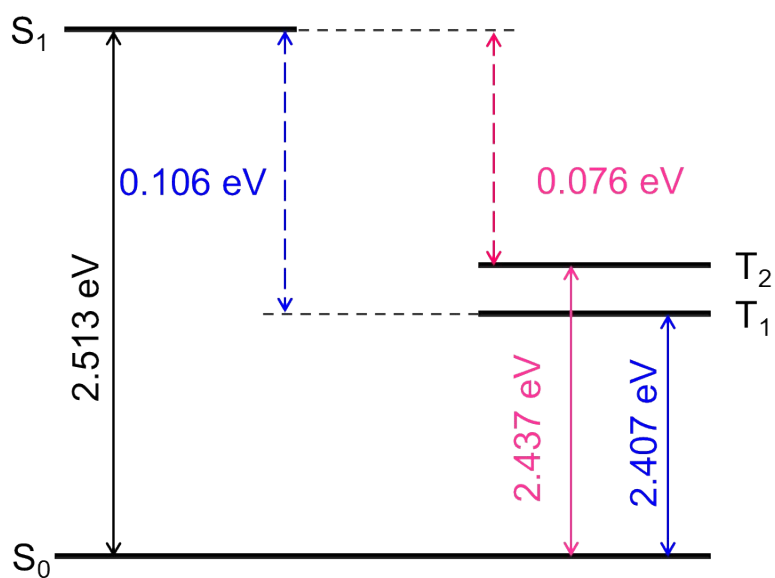

**Figure S20** Orbital energy diagram of complex 3.



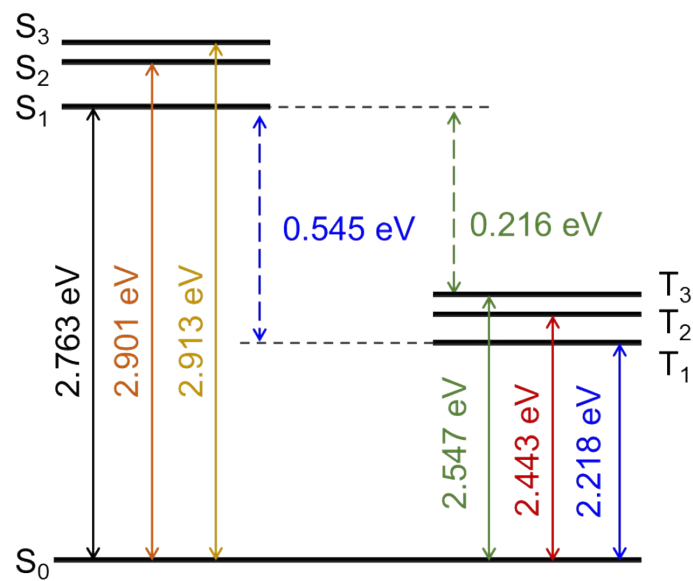

**Figure S21** Orbital energy diagram of complex 4.

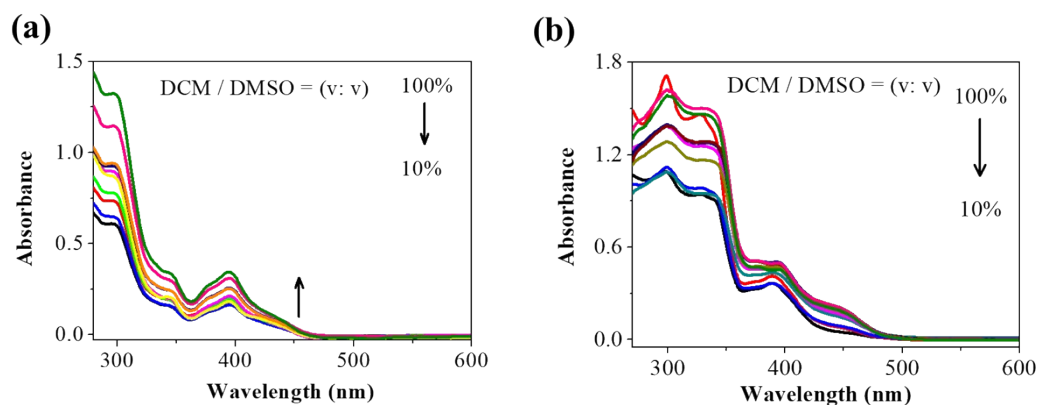

**Figure S22** UV-vis absorption spectra of **3** (a) and **4** (b) ( $10^{-6}$  M) upon increasing the DMSO content in DCM with the ratio of 0% to 90 %.

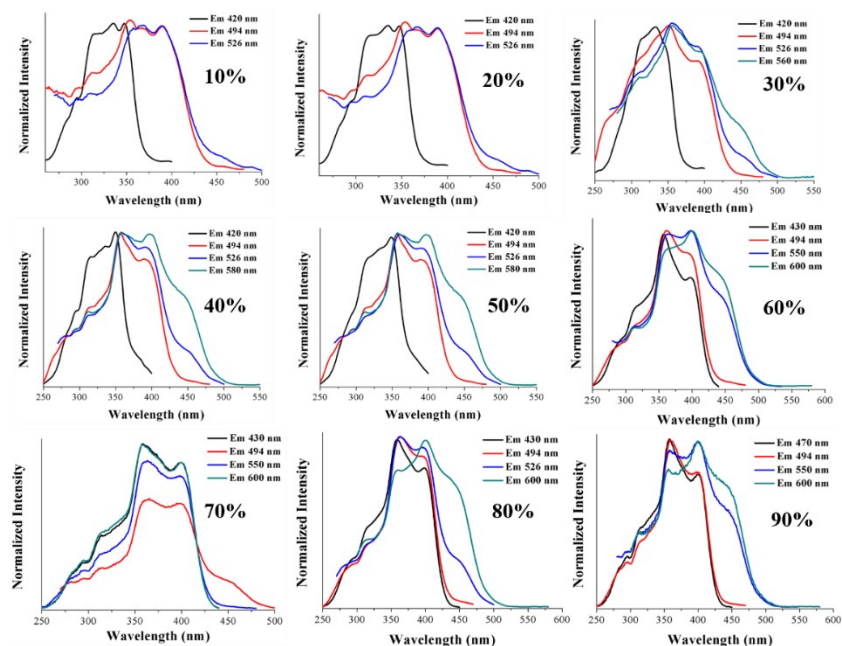

**Figure S23** Normalized excitation spectra of complex 4 under the different ratio of DCM/DMSO (10%–90%) at the concentration of  $10^{-5}$  M.

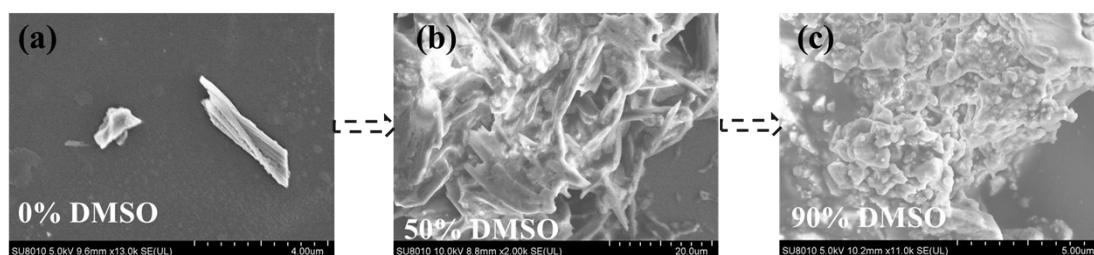

**Figure S24** SEM images of complex 3 in DCM/DMSO mixture solutions (0%, 50% and 90% DMSO, respectively).

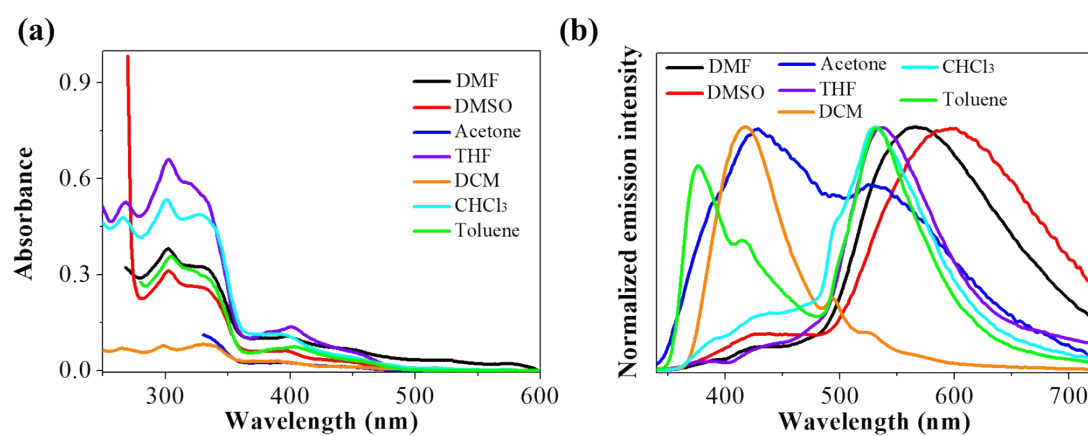

**Figure S25** (a) UV-vis absorption and (b) normalized emission spectra of complex 4 in different solvents ( $10^{-6}$  M) at room temperature.

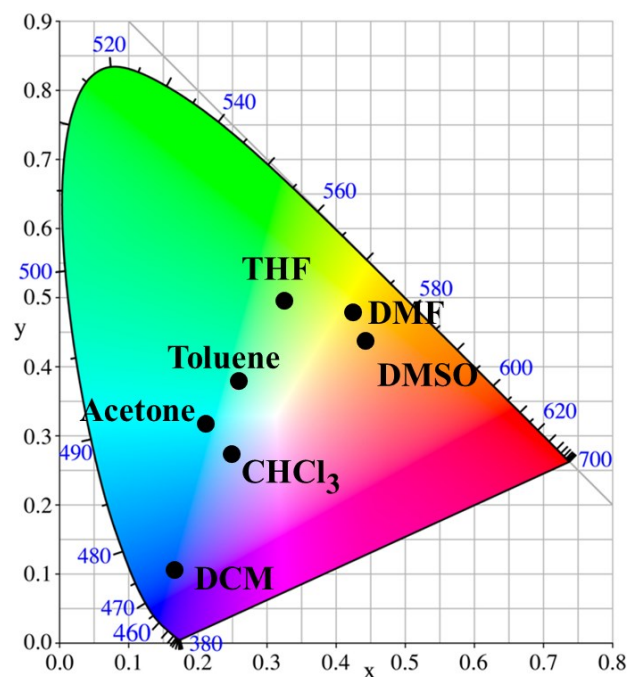

**Figure S26** Corresponding CIE graph of complex **4** in different solvents ( $10^{-6}$  M) at room temperature.

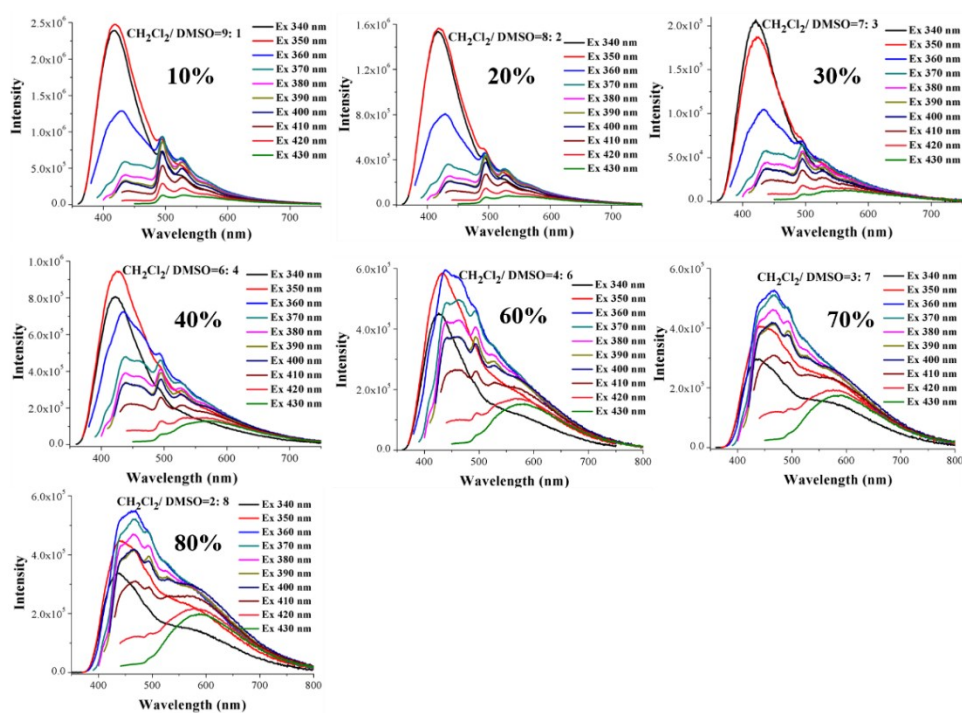

**Figure S27** Emission spectra of complex **4** under the different ratio of DCM/ DMSO (10%–40% and 60%–80%) at the concentration of  $10^{-5}$  M with different excitation bands.

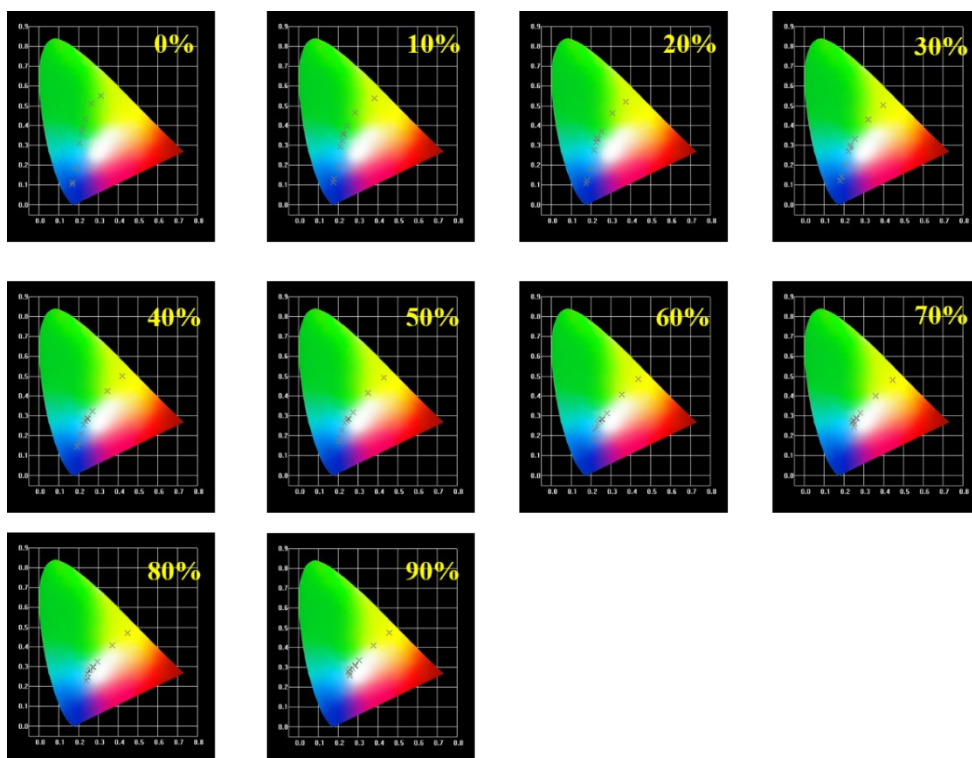

**Figure S28** CIE graphs of complex **4** under the different ratio of DCM/DMSO (0%–90%) at the concentration of  $10^{-5}$  M with different excitation bands.

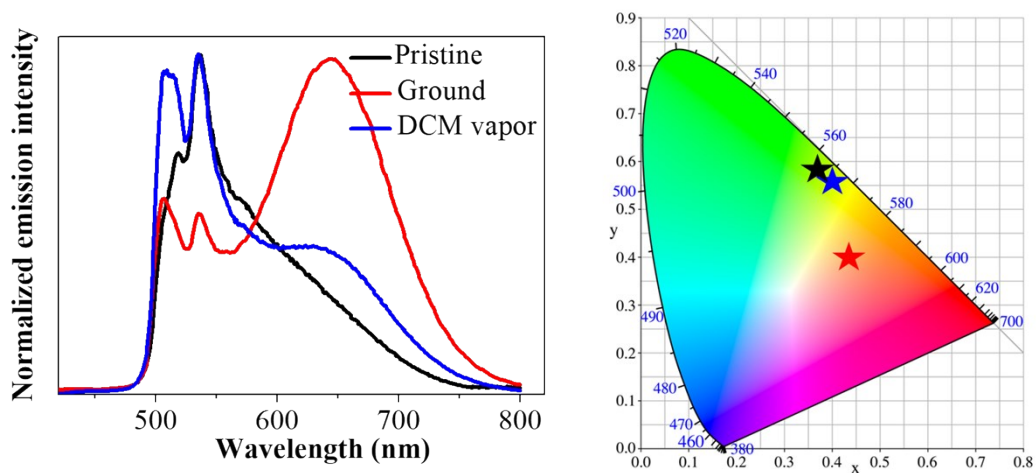

**Figure S29** Normalized emission spectra of complex **1** in the pristine, ground and DCM vapor recycling solid state at room temperature.

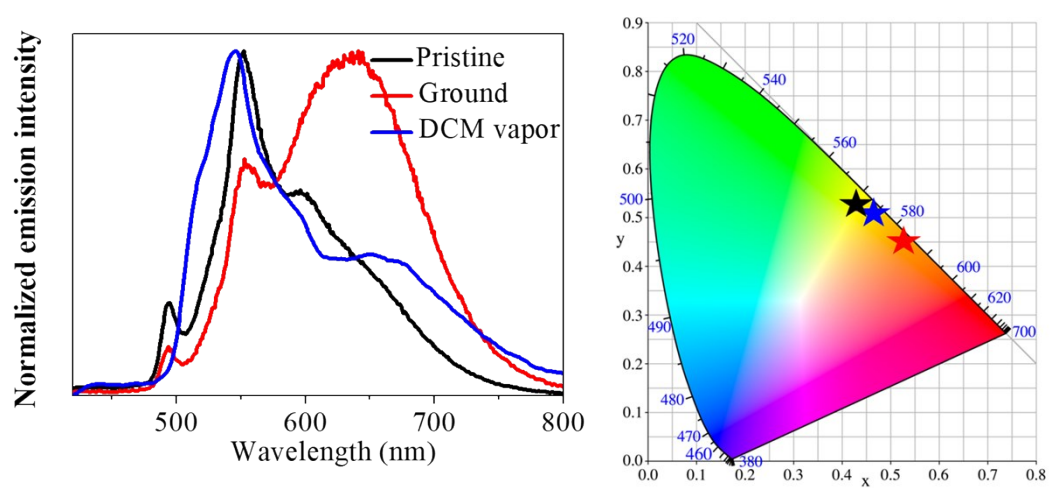

**Figure S30** Normalized emission spectra of complex **2** in the pristine, ground and DCM vapor recycling solid state at room temperature.

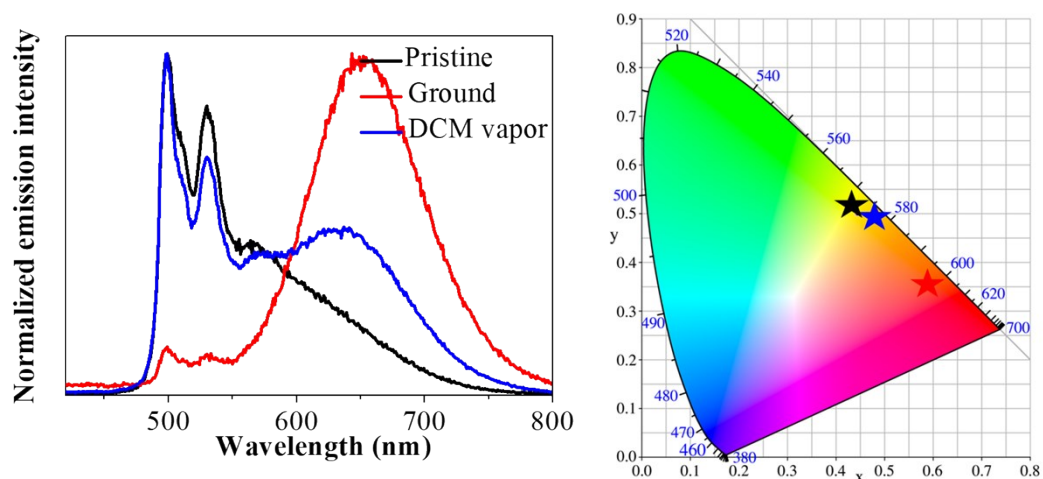

**Figure S31** Normalized emission spectra of complex **3** in the pristine, ground and DCM vapor recycling solid state at room temperature.

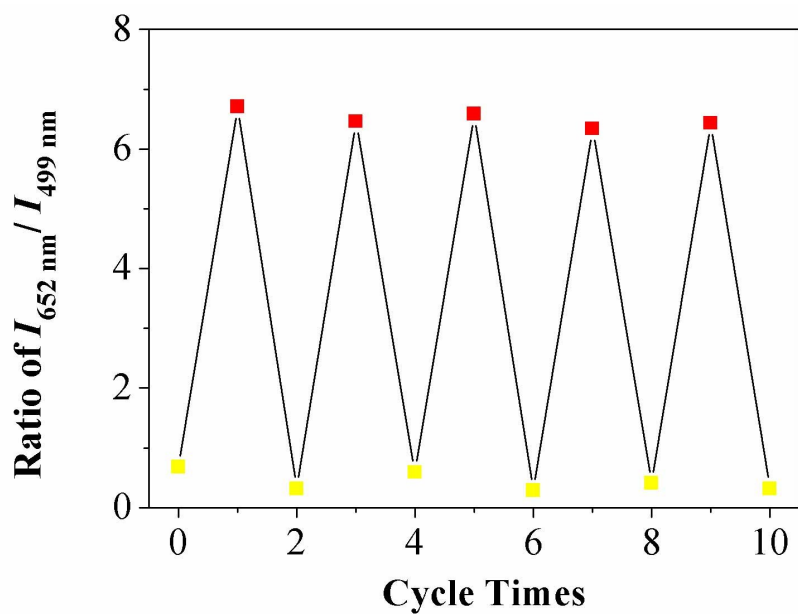

**Figure S32** Cycle tests for reversible grinding–fuming of **3** ( $\lambda_{\text{em max}} = 652 \text{ nm}$ ), ( $\lambda_{\text{em max}} = 499 \text{ nm}$ ).

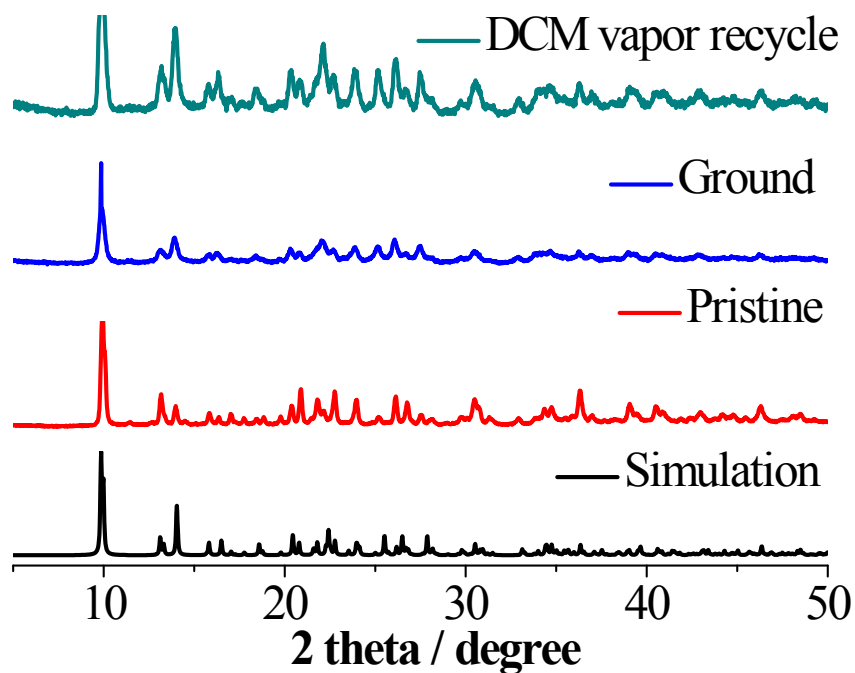

**Figure S33** XRD pattern of complex 1 for the pristine, ground and vapor recycling in solid state at room temperature.

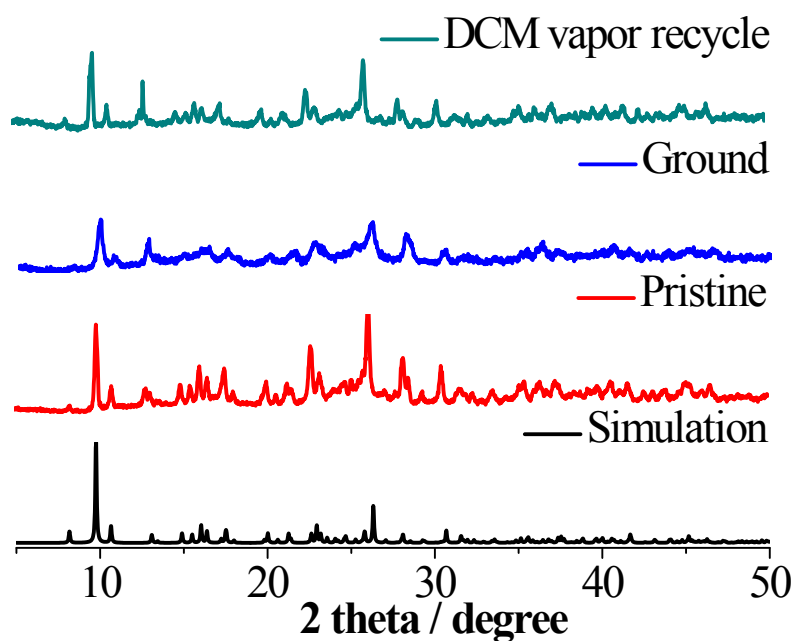

**Figure S34** XRD pattern of complex 2 for the pristine, ground and vapor recycling in solid state at room temperature.

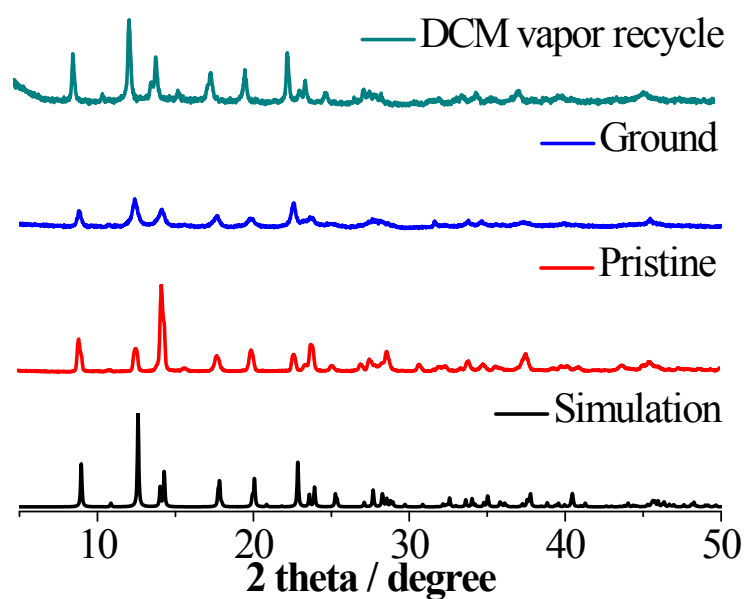

**Figure S35** XRD pattern of complex **3** for the pristine, ground and vapor recycling in solid state at room temperature.

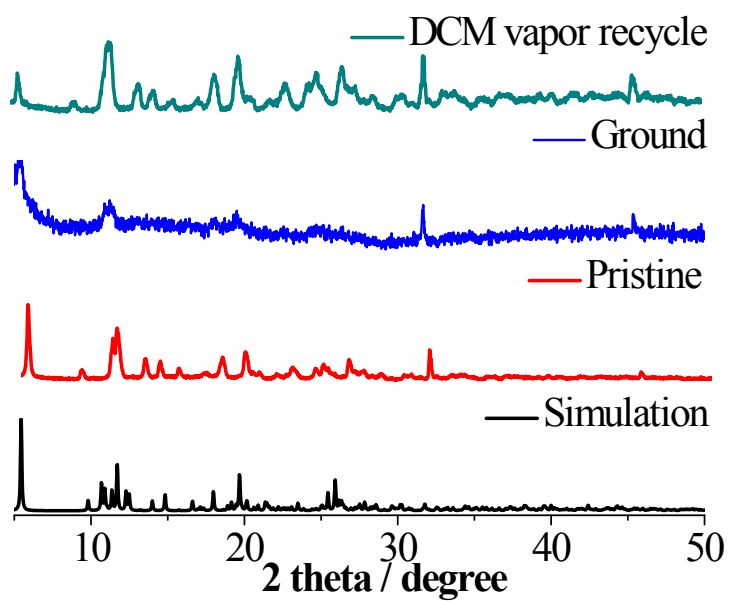

**Figure S36** XRD pattern of complex **4** for the pristine, ground and vapor recycling in solid state at room temperature.



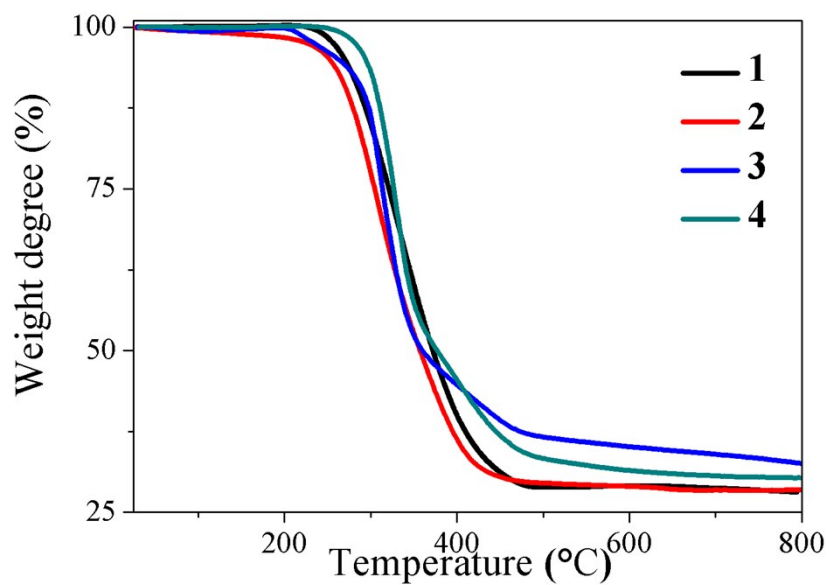

**Figure S37** TG analysis of the complexes 1–4.

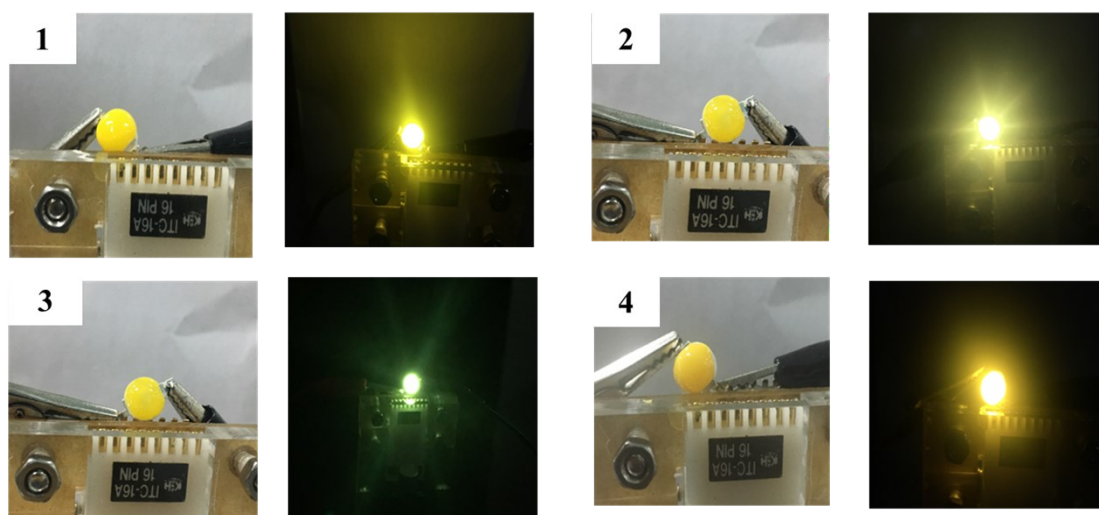

**Figure S38** Photographs for turned on or not of coated LEDs of the platinum(II) complexes 1–4.

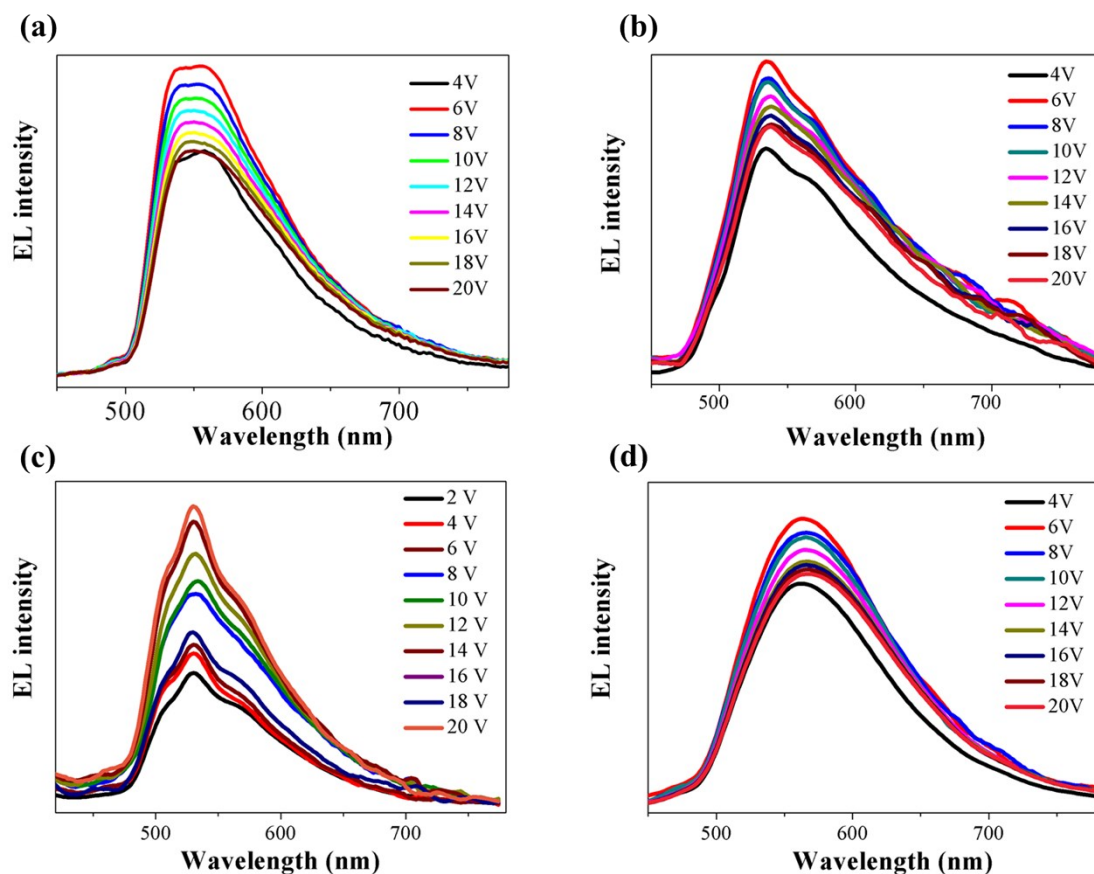

**Figure S39** EL spectra of the complexes 1–4 at different voltages range from 2–20 V.

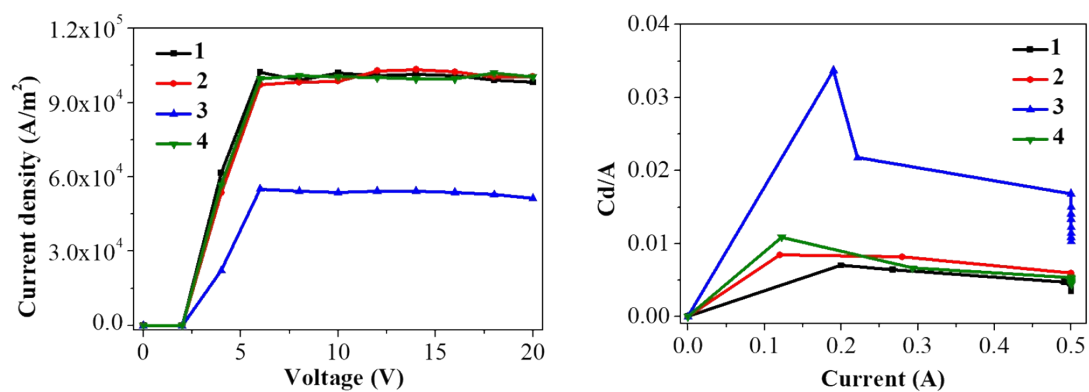

**Figure S40** Current density curves of device 1–4 at voltage (0–20V); and luminous efficiency of the device.

**Table S1** Crystal data and structure refinement for complexes **1–4**

| Compound                                            | <b>1</b>                                                          | <b>2</b>                                                          | <b>3</b>                                                          | <b>4</b>                                                          |
|-----------------------------------------------------|-------------------------------------------------------------------|-------------------------------------------------------------------|-------------------------------------------------------------------|-------------------------------------------------------------------|
| Empirical formula                                   | C <sub>18</sub> H <sub>15</sub> N <sub>2</sub> ClPt               | C <sub>17</sub> H <sub>10</sub> N <sub>3</sub> ClPt               | C <sub>26</sub> H <sub>20</sub> N <sub>2</sub> Pt                 | C <sub>38</sub> H <sub>29</sub> N <sub>3</sub> Pt                 |
| Formula weight                                      | 473.41                                                            | 486.82                                                            | 555.53                                                            | 722.73                                                            |
| <i>T</i> /K                                         | 150(2)                                                            | 150(2)                                                            | 150(2)                                                            | 150(2)                                                            |
| $\lambda$ /Å                                        | 1.54178                                                           | 1.54184                                                           | 1.54183                                                           | 1.54184                                                           |
| Crystal system                                      | monoclinic                                                        | orthorhombic                                                      | orthorhombic                                                      | triclinic                                                         |
| Space group                                         | <i>P2<sub>1</sub>/c</i>                                           | <i>Pbca</i>                                                       | <i>Pmma</i>                                                       | <i>P-1</i>                                                        |
| <i>a</i> /Å                                         | 8.10830(10)                                                       | 16.6149(4)                                                        | 9.9989(4)                                                         | 9.1490(7)                                                         |
| <i>b</i> /Å                                         | 10.3970(2)                                                        | 7.8827(2)                                                         | 12.4030(5)                                                        | 10.3561(8)                                                        |
| <i>c</i> /Å                                         | 18.1164(3)                                                        | 21.6484(5)                                                        | 16.2903(7)                                                        | 16.9236(11)                                                       |
| $\alpha$ /°                                         | 90                                                                | 90                                                                | 90                                                                | 73.883(6)                                                         |
| $\beta$ /°                                          | 102.212(2)                                                        | 90                                                                | 90                                                                | 6.213(6)                                                          |
| $\gamma$ /°                                         | 90                                                                | 90                                                                | 90                                                                | 65.045(7)                                                         |
| <i>V</i> /Å <sup>3</sup>                            | 1492.69(4)                                                        | 2835.30(12)                                                       | 2020.26(14)                                                       | 1394.2(2)                                                         |
| <i>Z</i>                                            | 4                                                                 | 8                                                                 | 2                                                                 | 2                                                                 |
| $\rho$ /g·cm <sup>-3</sup>                          | 2.107                                                             | 2.281                                                             | 1.826                                                             | 1.722                                                             |
| $\mu$ /mm <sup>-1</sup>                             | 17.652                                                            | 20.229                                                            | 6.960                                                             | 9.662                                                             |
| <i>F</i> (000)                                      | 896                                                               | 1824                                                              | 1072                                                              | 712                                                               |
| Data/restraints/parameters                          | 2899/0 /199                                                       | 2802/0/199                                                        | 2837/460/273                                                      | 5330/1/379                                                        |
| Quality-of-fit indicator                            | 1.008                                                             | 1.003                                                             | 1.403                                                             | 1.102                                                             |
| Final <i>R</i> indices [ <i>I</i> > 2σ( <i>I</i> )] | <i>R</i> <sub>1</sub> = 0.0704<br><i>wR</i> <sub>2</sub> = 0.1884 | <i>R</i> <sub>1</sub> = 0.0327<br><i>wR</i> <sub>2</sub> = 0.0763 | <i>R</i> <sub>1</sub> = 0.0722<br><i>wR</i> <sub>2</sub> = 0.2106 | <i>R</i> <sub>1</sub> = 0.0573<br><i>wR</i> <sub>2</sub> = 0.1476 |
| <i>R</i> indices (all data)                         | <i>R</i> <sub>1</sub> = 0.073<br><i>wR</i> <sub>2</sub> = 0.1927  | <i>R</i> <sub>1</sub> = 0.0394<br><i>wR</i> <sub>2</sub> = 0.0818 | <i>R</i> <sub>1</sub> = 0.0941<br><i>wR</i> <sub>2</sub> = 0.2180 | <i>R</i> <sub>1</sub> = 0.0713<br><i>wR</i> <sub>2</sub> = 0.1497 |

**Table S2** Selected bond lengths (Å) for complexes **1–4**

| <b>1</b>    | <b>2</b>    | <b>3</b>   | <b>4</b>    |
|-------------|-------------|------------|-------------|
| Pt(1)–C(13) | Pt(1)–C(5)  | Pt(1)–C(6) | Pt(1)–C(13) |
| 1.917(12)   | 1.894(6)    | 1.930(14)  | 1.955(9)    |
| Pt(1)–Cl(5) | Pt(1)–Cl(1) | Pt(1)–C(7) | Pt(1)–C(19) |
| 2.438(9)    | 2.4022(15)  | 2.045(18)  | 2.065(9)    |
| Pt(1)–N(1)  | Pt(1)–N(2)  | Pt(1)–N(1) | Pt(1)–N(1)  |
| 2.017(10)   | 2.032(5)    | 2.004(14)  | 2.009(8)    |
| Pt(1)–N(2)  | Pt(1)–N(3)  | Pt(1)–N(2) | Pt(1)–N(2)  |
| 2.011(9)    | 2.029(4)    | 2.018(13)  | 2.012(8)    |

**Table S3** Selected bond angles (°) for complexes **1–4**

| <b>1</b>       | <b>2</b>     | <b>3</b>     | <b>4</b>          |
|----------------|--------------|--------------|-------------------|
| C(13)–Pt–N(2)  | C(5)–Pt–N(3) | C(7)–Pt–N(1) | C(13)–Pt(1)–N(1)  |
| 81.3(4)        | 81.0(2)      | 80.3(4)      | 79.6(3)           |
| C(13)–Pt–N(1)  | C(5)–Pt–N(2) | C(7)–Pt–N(2) | C(13)–Pt(1)–N(2)  |
| 81.1(5)        | 80.5(2)      | 80.3(4)      | 80.9(3)           |
| N(2)–Pt–N(1)   | N(3)–Pt–N(2) | N(1)–Pt–N(2) | N(1)–Pt(1)–N(2)   |
| 162.3(4)       | 161.54(19)   | 160.67(9)    | 160.4(3)          |
| C(13)–Pt–Cl(1) | C(5)–Pt–Cl   | C(6)–Pt–N(1) | N(1)–Pt(1)–C(19)  |
| 178.6(3)       | 177.91(16)   | 99.7(4)      | 99.2(3)           |
| N(2)–Pt–Cl(1)  | N(3)–Pt–Cl   | C(6)–Pt–N(2) | N(2)–Pt(1)–C(19)  |
| 99.2(3)        | 99.10(14)    | 99.7(4)      | 100.3(3)          |
| N(1)–Pt–Cl(1)  | N(2)–Pt–Cl   | C(7)–Pt–C(6) | C(13)–Pt(1)–C(19) |
| 98.5(3)        | 99.36(14)    | 180          | 178.1(4)          |

**Table S4** The photophysical data for complexes 1–4

|          | Medium      | Electronic absorption                                                                                            | Emission                                          | QY [#]                         | $\chi^2$ |
|----------|-------------|------------------------------------------------------------------------------------------------------------------|---------------------------------------------------|--------------------------------|----------|
|          | T/K         | $\lambda_{\max}$ [nm] ( $\epsilon$ [dm <sup>3</sup> mol <sup>-1</sup> cm <sup>-1</sup> ])<br>(10 <sup>-5</sup> ) | $\lambda_{\text{em}}$ [nm] ( $\tau_0$ [ $\mu$ s]) | $\lambda_{\text{ex}}$<br>(380) |          |
| <b>1</b> | DCM (298)   | 242 (34010), 2 66 (26150),<br>297 (17720), 328(7230), 348<br>(6920), 389 (5830)                                  | 493, 526 (1.7)                                    | 0.017                          | 1.16     |
|          | Solid (298) | -                                                                                                                | 568, 678 (0.23)                                   | 0.087                          |          |
|          | Solid (77)  | -                                                                                                                | 542, 684 (1.12)                                   | -                              |          |
| <b>2</b> | DCM (298)   | 225 (27940), 267 (36220),<br>312 (5870), 358 (8920), 377<br>(10780), 406 (11310)                                 | 480, 513 (2.2)                                    | 0.018                          | 1.17     |
|          | Solid (298) | -                                                                                                                | 540, 649 (0.31)                                   | 0.016                          |          |
|          | Solid (77)  | -                                                                                                                | 554, 688 (0.9)                                    | -                              |          |
| <b>3</b> | DCM (298)   | 246(50500), 268 (60380), 297<br>(45360), 331 (9030), 342<br>(8040), 393 (9010)                                   | 503, 532 (1.8)                                    | 0.011                          | 1.17     |
|          | Solid (298) | -                                                                                                                | 523, 563 (0.65)                                   | 0.032                          |          |
|          | Solid (77)  | -                                                                                                                | 520, 580 (1.21)<br>640 (0.64)                     | -                              |          |
| <b>4</b> | DCM (298)   | 247 (36820), 2 66 (39420),<br>300 (60800), 3 27 (40500),<br>397 (9020), 446 (4090)                               | 528 (2.4), 569                                    | 0.009                          | 1.10     |
|          | Solid (298) | -                                                                                                                | 546, 687 (0.53)                                   | 0.073                          |          |
|          | Solid (77)  | -                                                                                                                | 541, 691 (1.11)                                   | -                              |          |

[-] Not measured. [#] The emission quantum yields were the maximum value under different excitation measured on a Hamamatsu C9920 -02G absolute PL quantum yield measurement system.  $\chi^2$  The value of "goodness-of-fit" parameter (chi-square).

**Table S5** DFT calculation data about HOMO and LUMO energy of complexes 1–4 (#H→L assigned to the transition from HOMO to LUMO. The excitations and oscillator strength dependent on the calculated results. The oscillator strength of  $S_0 \rightarrow T_1$  is 0, owing to the no consideration of intersystem crossing process in calculation.)

| Complex | #Main configuration<br>of $S_0 \rightarrow S_n$<br><sup>a</sup> excitation/nm<br><sup>b</sup> oscillator strength | #Main configuration<br>of $S_0 \rightarrow T_n$<br><sup>a</sup> excitation/nm                                                                        |                                                                                                                                |
|---------|-------------------------------------------------------------------------------------------------------------------|------------------------------------------------------------------------------------------------------------------------------------------------------|--------------------------------------------------------------------------------------------------------------------------------|
| 1       | $S_0 \rightarrow S_1$ :<br>H→L (96.79)<br><sup>a</sup> 373.24<br><sup>b</sup> 0.0093                              | $S_0 \rightarrow T_1$ :<br>H-4→L (2.57)<br>H-2→L+1 (6.18)<br>H→L (81.74)<br>H→L+1 (3.22)<br><sup>a</sup> 508.36                                      |                                                                                                                                |
|         | $S_0 \rightarrow S_2$ :<br>H→L+1 (94.33)<br>H-2→L (2.11)<br>360.72<br><sup>b</sup> 0.0587                         | $S_0 \rightarrow T_2$ :<br>H-4→L+1 (5.89)<br>H-2→L (5.44)<br>H-2→L+1 (2.87)<br>H→L (4.63)<br>H→L+1 (78.48)<br><sup>a</sup> 470.39                    |                                                                                                                                |
|         | $S_0 \rightarrow S_3$ :<br>H-1→L (93.76)<br>329.56<br><sup>b</sup> 0.0008                                         | $S_0 \rightarrow T_3$ :<br>H-5→L+1 (2.55)<br>H-5→L+2 (2.89)<br>H-4→L (4.06)<br>H-2→L (22.16)<br>H-2→L+1 (47.85)<br>H→L (9.79)<br><sup>a</sup> 448.48 |                                                                                                                                |
|         | 2                                                                                                                 | $S_0 \rightarrow S_1$ :<br>H-2→L (63.85)<br>H-2→L+1(33.28)<br>354.69<br><sup>b</sup> 0.0182                                                          | $S_0 \rightarrow T_1$ :<br>H-6→L (2.17)<br>H-3→L (3.10)<br>H→L (54.04)<br>H→L+1 (32.06)<br>H→L+3 (2.10)<br><sup>a</sup> 488.99 |

---

|          |                                                                                                                                                               |                                                                                                                                                                         |
|----------|---------------------------------------------------------------------------------------------------------------------------------------------------------------|-------------------------------------------------------------------------------------------------------------------------------------------------------------------------|
|          | $S_0 \rightarrow S_2:$<br>$H-4 \rightarrow L$ (63.55)<br>$H-3 \rightarrow L+1$<br>$H \rightarrow L+2$<br>333.25<br><sup>b</sup> 0.0248                        | $S_0 \rightarrow T_2:$<br>$H-4 \rightarrow L$ (3.48)<br>$H \rightarrow L$ (59.48)<br>$H \rightarrow L+1$ (31.24)<br><sup>a</sup> 476.98                                 |
|          | $S_0 \rightarrow S_1:$<br>$H \rightarrow L$ (92.39)<br><sup>a</sup> 359.43<br><sup>b</sup> 0.0059                                                             | $S_0 \rightarrow T_1:$<br>$H-4 \rightarrow L$ (2.06)<br>$H-2 \rightarrow L+1$ (3.06)<br>$H-1 \rightarrow L$ (32.53)<br>$H \rightarrow L$ (58.45)<br><sup>a</sup> 515.14 |
|          | $S_0 \rightarrow S_2:$<br>$H-1 \rightarrow L$ (97.83)<br>$H \rightarrow L+1$<br><sup>a</sup> 327.86<br><sup>b</sup> 0.0321                                    | $S_0 \rightarrow T_2:$<br>$H-2 \rightarrow L+1$ (5.62)<br>$H-1 \rightarrow L$ (49.11)<br>$H \rightarrow L$ (39.43)<br><sup>a</sup> 489.05                               |
| <b>3</b> | $S_0 \rightarrow S_3:$<br>$H-2 \rightarrow L+1$ (97.30)<br>$H-1 \rightarrow L+1$<br><sup>a</sup> 305.24<br><sup>b</sup> 0.1470                                | $S_0 \rightarrow T_3:$<br>$H-4 \rightarrow L+1$ (5.79)<br>$H-1 \rightarrow L+1$ (42.56)<br>$H \rightarrow L+1$ (49.12)<br><sup>a</sup> 488.87                           |
|          | $S_0 \rightarrow S_4:$<br>$H-2 \rightarrow L+1$ (60.84)<br>$H \rightarrow L+2$<br><sup>a</sup> 294.22<br><sup>b</sup> 0.0971                                  | $S_0 \rightarrow T_4:$<br>$H-4 \rightarrow L+1$ (2.55)<br>$H-1 \rightarrow L+1$ (44.92)<br>$H-2 \rightarrow L+1$ (49.36)<br><sup>a</sup> 462.82                         |
| <b>4</b> | $S_0 \rightarrow S_1:$<br>$H-2 \rightarrow L$ (2.23)<br>$H-1 \rightarrow L$ (87.60)<br>$H \rightarrow L$ (8.60)<br><sup>a</sup> 448.78<br><sup>b</sup> 0.0283 | $S_0 \rightarrow T_1:$<br>$H-1 \rightarrow L$ (30.43)<br>$H \rightarrow L$ (63.57)<br><sup>a</sup> 559.03                                                               |

---

|                                                                                                                                                                                                    |                                                                                                                                                                                                          |
|----------------------------------------------------------------------------------------------------------------------------------------------------------------------------------------------------|----------------------------------------------------------------------------------------------------------------------------------------------------------------------------------------------------------|
| $S_0 \rightarrow S_2$ :<br>H-2 $\rightarrow$ L (5.36)<br>H-2 $\rightarrow$ L+1 (4.59)<br>H-1 $\rightarrow$ L+1 (79.33)<br>H $\rightarrow$ L+1 (8.36)<br><sup>a</sup> 427.42<br><sup>b</sup> 0.0255 | $S_0 \rightarrow T_2$ :<br>H-4 $\rightarrow$ L+1 (2.54)<br>H-1 $\rightarrow$ L+1 (24.44)<br>H $\rightarrow$ L+1 (68.52)<br><sup>a</sup> 507.44                                                           |
| $S_0 \rightarrow S_3$ :<br>H-2 $\rightarrow$ L (89.55)<br>H-1 $\rightarrow$ L+1 (5.20)<br><sup>a</sup> 327.63<br><sup>b</sup> 0.0340                                                               | $S_0 \rightarrow T_3$ :<br>H-4 $\rightarrow$ L (7.27)<br>H-3 $\rightarrow$ L+1 (17.64)<br>H-2 $\rightarrow$ L (18.90)<br>H-1 $\rightarrow$ L (22.55)<br>H $\rightarrow$ L (22.97)<br><sup>a</sup> 486.78 |
| $S_0 \rightarrow S_4$ :<br>H-2 $\rightarrow$ L (89.55)<br>H-1 $\rightarrow$ L+1 (5.20)<br><sup>a</sup> 299.56<br><sup>b</sup> 0.0685                                                               | $S_0 \rightarrow T_4$ :<br>H-3 $\rightarrow$ L+1 (36.35)<br>H-2 $\rightarrow$ L+1 (8.23)<br>H-1 $\rightarrow$ L (20.73)<br>H $\rightarrow$ L (7.37)<br>H $\rightarrow$ L+1 (6.39)<br><sup>a</sup> 459.11 |

**Table S6** Molecular orbital (MO) compositions of complexes **1–4** based on the optimized  $S_0$  states.

| Complex  | MO   | Pt(%) | N <sup>^</sup> C <sup>^</sup> N<br>units | Alkynyl<br>ligands |
|----------|------|-------|------------------------------------------|--------------------|
| <b>1</b> | LUMO | 2.63  | 93.09                                    | /                  |
|          | HOMO | 23.46 | 67.01                                    | /                  |
| <b>2</b> | LUMO | 2.55  | 95.22                                    | /                  |
|          | HOMO | 21.35 | 70.21                                    | /                  |
| <b>3</b> | LUMO | 1.25  | 92.07                                    | 2.78               |
|          | HOMO | 25.9  | 3.17                                     | 68.49              |
| <b>4</b> | LUMO | 1.39  | 91.83                                    | 1.02               |
|          | HOMO | 26.34 | 0.89                                     | 66.38              |



**Table S7** Cartesian coordinates of the optimized ground–state geometry for complex **1**

---

|    |            |            |             |
|----|------------|------------|-------------|
| Pt | 2.54920000 | 3.04540000 | 14.08020000 |
| Cl | 0.18080000 | 2.97350000 | 14.48130000 |
| N  | 9.65820000 | 3.41720000 | 12.88730000 |
| N  | 2.55700000 | 4.06510000 | 12.32010000 |
| N  | 3.18510000 | 2.04240000 | 15.72760000 |
| C  | 8.54170000 | 3.39430000 | 13.14710000 |
| C  | 7.12110000 | 3.35010000 | 13.41980000 |
| C  | 6.65430000 | 2.69430000 | 14.57800000 |
| H  | 7.24410000 | 2.33560000 | 15.20150000 |
| C  | 5.27020000 | 2.60440000 | 14.75340000 |
| C  | 4.42120000 | 3.16730000 | 13.79650000 |
| C  | 4.90140000 | 3.80420000 | 12.63620000 |
| C  | 6.26880000 | 3.89640000 | 12.44780000 |
| H  | 6.61610000 | 4.31100000 | 11.69010000 |
| C  | 3.79480000 | 4.29210000 | 11.79190000 |
| C  | 3.94940000 | 4.91570000 | 10.57960000 |
| H  | 4.80000000 | 5.05600000 | 10.23100000 |
| C  | 2.84110000 | 5.33030000 | 9.88250000  |
| H  | 2.93590000 | 5.73620000 | 9.05120000  |
| C  | 1.58340000 | 5.14030000 | 10.42370000 |
| H  | 0.82410000 | 5.43430000 | 9.97560000  |

---

---

|   |            |            |             |
|---|------------|------------|-------------|
| C | 1.47870000 | 4.50020000 | 11.65550000 |
| H | 0.63640000 | 4.37100000 | 12.02570000 |
| C | 4.53420000 | 1.95180000 | 15.85750000 |
| C | 5.11910000 | 1.26360000 | 16.92260000 |
| H | 6.04450000 | 1.20680000 | 17.00700000 |
| C | 4.28500000 | 0.67160000 | 17.84040000 |
| H | 4.65050000 | 0.19470000 | 18.55050000 |
| C | 2.92420000 | 0.77250000 | 17.72790000 |
| H | 2.36430000 | 0.38390000 | 18.36000000 |
| C | 2.40250000 | 1.46780000 | 16.64760000 |
| H | 1.48040000 | 1.53630000 | 16.56100000 |

---

**Table S8** Cartesian coordinates of the optimized ground-state geometry for complex **2**

---

|    |            |            |             |
|----|------------|------------|-------------|
| Pt | 2.54920000 | 3.04540000 | 14.08020000 |
| Cl | 0.18080000 | 2.97350000 | 14.48130000 |
| N  | 9.65820000 | 3.41720000 | 12.88730000 |
| N  | 2.55700000 | 4.06510000 | 12.32010000 |
| N  | 3.18510000 | 2.04240000 | 15.72760000 |
| C  | 8.54170000 | 3.39430000 | 13.14710000 |
| C  | 7.12110000 | 3.35010000 | 13.41980000 |
| C  | 6.65430000 | 2.69430000 | 14.57800000 |
| H  | 7.24410000 | 2.33560000 | 15.20150000 |

---

---

|   |            |            |             |
|---|------------|------------|-------------|
| C | 5.27020000 | 2.60440000 | 14.75340000 |
| C | 4.42120000 | 3.16730000 | 13.79650000 |
| C | 4.90140000 | 3.80420000 | 12.63620000 |
| C | 6.26880000 | 3.89640000 | 12.44780000 |
| H | 6.61610000 | 4.31100000 | 11.69010000 |
| C | 3.79480000 | 4.29210000 | 11.79190000 |
| C | 3.94940000 | 4.91570000 | 10.57960000 |
| H | 4.80000000 | 5.05600000 | 10.23100000 |
| C | 2.84110000 | 5.33030000 | 9.88250000  |
| H | 2.93590000 | 5.73620000 | 9.05120000  |
| C | 1.58340000 | 5.14030000 | 10.42370000 |
| H | 0.82410000 | 5.43430000 | 9.97560000  |
| C | 1.47870000 | 4.50020000 | 11.65550000 |
| H | 0.63640000 | 4.37100000 | 12.02570000 |
| C | 4.53420000 | 1.95180000 | 15.85750000 |
| C | 5.11910000 | 1.26360000 | 16.92260000 |
| H | 6.04450000 | 1.20680000 | 17.00700000 |
| C | 4.28500000 | 0.67160000 | 17.84040000 |
| H | 4.65050000 | 0.19470000 | 18.55050000 |
| C | 2.92420000 | 0.77250000 | 17.72790000 |
| H | 2.36430000 | 0.38390000 | 18.36000000 |
| C | 2.40250000 | 1.46780000 | 16.64760000 |

---

|   |            |            |             |
|---|------------|------------|-------------|
| H | 1.48040000 | 1.53630000 | 16.56100000 |
|---|------------|------------|-------------|

**Table S9** Cartesian coordinates of the optimized ground–state geometry for complex **3**

|    |             |             |             |
|----|-------------|-------------|-------------|
| Pt | 0.06838100  | 0.00001600  | 0.00001300  |
| N  | 0.41684900  | -2.02429900 | -0.02154600 |
| N  | 0.41692900  | 2.02431700  | 0.02163400  |
| C  | -0.55104900 | -2.95558200 | -0.03298000 |
| H  | -1.56192500 | -2.56294500 | -0.03018700 |
| C  | -0.27060000 | -4.31647700 | -0.04731200 |
| H  | -1.08238300 | -5.03482700 | -0.05634200 |
| C  | 1.06451800  | -4.71186200 | -0.04973200 |
| H  | 1.32950100  | -5.76499900 | -0.06068200 |
| C  | 2.06927000  | -3.74810800 | -0.03829500 |
| H  | 3.10160000  | -4.06116300 | -0.04046400 |
| C  | 1.75302900  | -2.38208600 | -0.02427500 |
| C  | 2.69500600  | -1.24213800 | -0.01221400 |
| C  | 4.10977200  | -1.24542900 | -0.01210200 |
| C  | 4.97530200  | -2.48377000 | -0.02371600 |
| H  | 4.79780900  | -3.11585600 | 0.85429100  |
| H  | 4.79894500  | -3.09869400 | -0.91406900 |
| H  | 6.03352100  | -2.21095300 | -0.02041500 |
| C  | 4.75620200  | -0.00007400 | -0.00024400 |

---

|   |             |             |             |
|---|-------------|-------------|-------------|
| H | 5.84329200  | -0.00009400 | -0.00037800 |
| C | 4.97539800  | 2.48361600  | 0.02310200  |
| H | 6.03360500  | 2.21076500  | 0.01920700  |
| H | 4.79746600  | 3.11584900  | -0.85470500 |
| H | 4.79953300  | 3.09840300  | 0.91365200  |
| C | 4.10982000  | 1.24530500  | 0.01174500  |
| C | 2.69505500  | 1.24206400  | 0.01216300  |
| C | 2.03116900  | -0.00002500 | 0.00001400  |
| C | 1.75312400  | 2.38204700  | 0.02441500  |
| C | 2.06942700  | 3.74805200  | 0.03876000  |
| H | 3.10177200  | 4.06105700  | 0.04108500  |
| C | 1.06471700  | 4.71184800  | 0.05036900  |
| H | 1.32974600  | 5.76497000  | 0.06157600  |
| C | -0.27041800 | 4.31652100  | 0.04781200  |
| H | -1.08216900 | 5.03490500  | 0.05695900  |
| C | -0.55092700 | 2.95564100  | 0.03322400  |
| H | -1.56182000 | 2.56304700  | 0.03035400  |
| C | -3.22355600 | 0.00004600  | -0.00004500 |
| C | -1.99358900 | 0.00005800  | -0.00002800 |
| C | -4.65123500 | 0.00004400  | -0.00008700 |
| C | -5.37868200 | 0.29790700  | -1.17250300 |
| C | -5.37875200 | -0.29783400 | 1.17228300  |

---

---

|   |             |             |             |
|---|-------------|-------------|-------------|
| C | -6.77148100 | 0.29675900  | -1.16924200 |
| H | -4.83199200 | 0.52756800  | -2.08198900 |
| C | -6.77155100 | -0.29670600 | 1.16893400  |
| H | -4.83211600 | -0.52749200 | 2.08180200  |
| C | -7.47684500 | 0.00002300  | -0.00017600 |
| H | -7.30999800 | 0.52854000  | -2.08457200 |
| H | -7.31012200 | -0.52849700 | 2.08422900  |
| H | -8.56321200 | 0.00001500  | -0.00021000 |

---

**Table S10** Cartesian coordinates of the optimized ground-state geometry for complex **4**

---

|    |             |             |             |
|----|-------------|-------------|-------------|
| Pt | -2.58391500 | 0.00873700  | -0.07961500 |
| N  | -2.84730700 | -1.94968300 | 0.28089200  |
| N  | -2.99728300 | 1.96050600  | -0.33762600 |
| N  | 6.36789100  | 0.00089200  | -0.02407800 |
| C  | -1.84659200 | -2.84142000 | 0.48354200  |
| H  | -0.96738400 | -2.54476100 | 0.42997800  |
| C  | -2.07904900 | -4.16877500 | 0.76645300  |
| H  | -1.36630300 | -4.75795700 | 0.86600000  |
| C  | -3.37032200 | -4.61790000 | 0.90068800  |
| H  | -3.56461900 | -5.50754200 | 1.08929900  |
| C  | -4.22297000 | -3.80126500 | 0.76156100  |
| H  | -5.08570500 | -4.12267000 | 0.89567200  |

---

---

|   |             |             |             |
|---|-------------|-------------|-------------|
| C | -4.15499400 | -2.36830100 | 0.41291400  |
| C | -5.13477600 | -1.25959600 | 0.20133400  |
| C | -6.55488800 | -1.34390900 | 0.20580900  |
| C | -7.54344200 | -2.52529500 | 0.26475200  |
| H | -7.05586500 | -3.34781000 | 0.35316900  |
| H | -8.12747800 | -2.41763500 | 1.01915700  |
| H | -8.06491700 | -2.54740600 | -0.54096600 |
| C | -7.23505200 | -0.13313500 | 0.07747100  |
| H | -8.16339800 | -0.16463100 | 0.09604200  |
| C | -6.63820300 | 1.13114200  | -0.07672700 |
| C | -7.55330000 | 2.33066900  | -0.16648000 |
| H | -8.46566300 | 2.04248500  | -0.09874400 |
| H | -7.35484900 | 2.93821900  | 0.55016800  |
| H | -7.41817400 | 2.77378400  | -1.00735300 |
| C | -5.25080500 | 1.16462800  | -0.13616200 |
| C | -4.53536900 | -0.07260600 | 0.01454600  |
| C | -4.32740200 | 2.30609500  | -0.33119600 |
| C | -4.69708500 | 3.65220400  | -0.45931100 |
| H | -5.59830700 | 3.88633300  | -0.46182600 |
| C | -3.72610000 | 4.63408500  | -0.58216500 |
| H | -3.97460900 | 5.52599900  | -0.66108600 |
| C | -2.38917900 | 4.28832400  | -0.58681400 |

---

---

|   |             |             |             |
|---|-------------|-------------|-------------|
| H | -1.72883400 | 4.93703000  | -0.67365700 |
| C | -2.05744700 | 2.93825800  | -0.45821200 |
| H | -1.16003500 | 2.69627100  | -0.45492900 |
| C | -0.52559600 | 0.04470600  | -0.22384500 |
| C | 0.69102300  | 0.00861200  | -0.28118700 |
| C | 2.12959500  | -0.02171500 | -0.26535700 |
| C | 2.80335200  | -0.82201200 | 0.64389900  |
| H | 2.31178200  | -1.37995800 | 1.20242400  |
| C | 4.18207600  | -0.81851200 | 0.75067200  |
| H | 4.60420700  | -1.33901300 | 1.39439100  |
| C | 4.93029100  | -0.02884300 | -0.11319400 |
| C | 4.28603600  | 0.73660400  | -1.07475200 |
| H | 4.78509600  | 1.23048500  | -1.68480500 |
| C | 2.90970100  | 0.76873000  | -1.13090100 |
| H | 2.48868400  | 1.32059200  | -1.75004000 |
| C | 7.13012900  | -1.11257700 | -0.40093300 |
| C | 6.56422000  | -2.15939500 | -1.12602900 |
| H | 5.67288000  | -2.09726500 | -1.38403000 |
| C | 7.28336500  | -3.28933700 | -1.47541600 |
| H | 6.87092300  | -3.97676400 | -1.94767700 |
| C | 8.62952300  | -3.39248700 | -1.11779600 |
| H | 9.12759600  | -4.13805600 | -1.36451900 |

---



---

|   |             |             |             |
|---|-------------|-------------|-------------|
| C | 9.20121100  | -2.37411100 | -0.39561100 |
| H | 10.09527000 | -2.43972200 | -0.14879400 |
| C | 8.47739500  | -1.25045100 | -0.02630000 |
| H | 8.88825000  | -0.58200300 | 0.47423100  |
| C | 6.95238600  | 1.20031000  | 0.47474100  |
| C | 7.99709800  | 1.79381000  | -0.19096700 |
| H | 8.33430600  | 1.40130500  | -0.96386200 |
| C | 8.56086400  | 2.99134400  | 0.28962000  |
| H | 9.24837000  | 3.40220600  | -0.18300600 |
| C | 8.09451000  | 3.56075600  | 1.46058900  |
| H | 8.49766200  | 4.32413000  | 1.80780800  |
| C | 7.00822500  | 2.96962700  | 2.11648100  |
| H | 6.65293100  | 3.36720100  | 2.87892400  |
| C | 6.45389400  | 1.77797900  | 1.62276800  |
| H | 5.74656000  | 1.37619000  | 2.07278300  |

---

## References

1. G. Sheldrick, *J Acta Crystallographica Section A*, 2008, **64**, 112-122.
2. O. V. Dolomanov, L. J. Bourhis, R. J. Gildea, J. A. K. Howard and H. Puschmann, *J. Appl. Crystallogr.*, 2009, **42**, 339-341.
3. X. Gao, S. Bai, D. Fazzi, T. Niehaus, M. Barbatti and W. Thiel, *J. Chem. Theory Comput.*, 2017, **13**, 515-524.
4. K. Y. Suponitsky, S. Tafur and A. E. Masunov, *J. Chem. Phys.*, 2008, **129**, 044109.
5. J. A. G. Williams, Andrew Beeby, E. S. Davies, J. A. Weinstein and C. Wilson, *Inorg. Chem.*, 2003, **42**, 8609-8611.
6. A. Y.-Y. Tam, D. P.-K. Tsang, M.-Y. Chan, N. Zhu and V. W.-W. Yam, *Chem. Commun.*, 2011, **47**, 3383-3385.
7. J. Kuwabara, K. Yamaguchi, K. Yamawaki, T. Yasuda, Y. Nishimura and T. Kanbara, *Inorg. Chem.*, 2017, **56**, 8726-8729.
8. B. Schulze, C. Friebe, M. Jäger, H. Görls, E. Birckner, A. Winter and U. S. Schubert, *Organometallics*, 2017, **37**, 145-155.
